# Supplementary material for: Genome-Wide Occupancy of SREBP1 and Its Partners NFY and SP1 Reveals Novel Functional Roles and Combinatorial Regulation of Distinct Classes of Genes
Source: PLoS Genet. 2008 Jul 25;4(7):e1000133. doi: 10.1371/journal.pgen.1000133 (PMC2478640; doi:10.1371/journal.pgen.1000133)
Supplement: Table S8 — Results of Gene Set Enrichment Analysis. For each SREBP1 target gene, the corresponding rank and fold change in the Affymetrix fasted vs. refed gene expression dataset is indicated along with the value of the running-sum statistic (Running ES) at that point in the ranked list (see Materials and Methods). In addition, genes in the leading-edge subset (Core enrichment = Yes), which are responsible for the biased distribution of SREBP1 target genes in the ranked list, are highlighted in green. (0.18 MB XLS) [file pgen.1000133.s011.xls]

## Sheet: SREBP1_unique_EntrezGene_target
SREBP1 target gene (Entrez GeneID)	Gene Name	Rank in Affymetrix fasted vs. refed dataset	Fold change (log2) in Affymetrix dataset	Running ES	Core enrichment
353189	HYPOTHETICAL PROTEIN PRO2176	0	2.74987	0.000938086	Yes
10628	THIOREDOXIN INTERACTING PROTEIN	2	2.63372	0.00180366	Yes
3157	3-HYDROXY-3-METHYLGLUTARYL-COENZYME A SYNTHASE 1 (SOLUBLE)	10	2.09439	0.00223417	Yes
80339	ADIPONUTRIN	17	1.85137	0.00273719	Yes
2222	FARNESYL-DIPHOSPHATE FARNESYLTRANSFERASE 1	19	1.83728	0.00360277	Yes
39	ACETYL-COENZYME A ACETYLTRANSFERASE 2 (ACETOACETYL COENZYME A THIOLASE)	26	1.72186	0.00410579	Yes
3422	ISOPENTENYL-DIPHOSPHATE DELTA ISOMERASE 1	33	1.62582	0.00460881	Yes
4047	LANOSTEROL SYNTHASE (2,3-OXIDOSQUALENE-LANOSTEROL CYCLASE)	39	1.57902	0.00518434	Yes
10438	NUCLEAR DNA-BINDING PROTEIN	44	1.54766	0.00583238	Yes
80777	CYTOCHROME B5 TYPE B (OUTER MITOCHONDRIAL MEMBRANE)	49	1.53477	0.00648042	Yes
23658	LSM5 HOMOLOG, U6 SMALL NUCLEAR RNA ASSOCIATED (S. CEREVISIAE)	51	1.53198	0.007346	Yes
50814	NAD(P) DEPENDENT STEROID DEHYDROGENASE-LIKE	56	1.5093	0.00799404	Yes
55745	CHROMOSOME 14 OPEN READING FRAME 108	72	1.42589	0.00784446	Yes
27346	TRANSMEMBRANE PROTEIN 97	73	1.42473	0.00878254	Yes
64801	ARV1 HOMOLOG (YEAST)	75	1.40985	0.00964812	Yes
6309	STEROL-C5-DESATURASE (ERG3 DELTA-5-DESATURASE HOMOLOG, FUNGAL)-LIKE	78	1.39891	0.0104412	Yes
51449	PRENYLCYSTEINE OXIDASE 1	86	1.37787	0.0108717	Yes
1717	7-DEHYDROCHOLESTEROL REDUCTASE	92	1.3487	0.0114472	Yes
92667	CHROMOSOME 20 OPEN READING FRAME 72	94	1.34113	0.0123128	Yes
196294	IMP1 INNER MITOCHONDRIAL MEMBRANE PEPTIDASE-LIKE (S. CEREVISIAE)	96	1.33108	0.0131784	Yes
84520	CHROMOSOME 14 OPEN READING FRAME 142	102	1.31719	0.0137539	Yes
197259	MIXED LINEAGE KINASE DOMAIN-LIKE	107	1.30425	0.0144019	Yes
29901	SAC3 DOMAIN CONTAINING 1	110	1.29536	0.015195	Yes
51155	HEMATOLOGICAL AND NEUROLOGICAL EXPRESSED 1	112	1.28731	0.0160606	Yes
163183	HYPOTHETICAL PROTEIN FLJ36445	120	1.25627	0.0164911	Yes
2224	FARNESYL DIPHOSPHATE SYNTHASE (FARNESYL PYROPHOSPHATE SYNTHETASE, DIMETHYLALLYLTRANSTRANSFERASE, GERANYLTRANSTRANSFERASE)	123	1.24831	0.0172842	Yes
3156	3-HYDROXY-3-METHYLGLUTARYL-COENZYME A REDUCTASE	128	1.23507	0.0179322	Yes
11161	CHROMOSOME 14 OPEN READING FRAME 1	129	1.23393	0.0188703	Yes
130355	HYPOTHETICAL PROTEIN LOC130355	130	1.22662	0.0198084	Yes
79714	COILED-COIL DOMAIN CONTAINING 51	131	1.22466	0.0207465	Yes
145389	SOLUTE CARRIER FAMILY 38, MEMBER 6	145	1.1909	0.0207419	Yes
54205	CYTOCHROME C, SOMATIC	162	1.16598	0.0205198	Yes
11339	OPA INTERACTING PROTEIN 5	166	1.16038	0.0212404	Yes
2182	ACYL-COA SYNTHETASE LONG-CHAIN FAMILY MEMBER 4	171	1.14614	0.0218884	Yes
1479	CLEAVAGE STIMULATION FACTOR, 3' PRE-RNA, SUBUNIT 3, 77KDA	182	1.11769	0.0221014	Yes
1595	CYTOCHROME P450, FAMILY 51, SUBFAMILY A, POLYPEPTIDE 1	189	1.11352	0.0226044	Yes
47	ATP CITRATE LYASE	190	1.11192	0.0235425	Yes
9675	KIAA0406 GENE PRODUCT	206	1.09329	0.0233929	Yes
51053	GEMININ, DNA REPLICATION INHIBITOR	214	1.07132	0.0238234	Yes
9388	LIPASE, ENDOTHELIAL	229	1.04843	0.0237463	Yes
10615	SPERM ASSOCIATED ANTIGEN 5	241	1.03906	0.0238868	Yes
54344	DOLICHYL-PHOSPHATE MANNOSYLTRANSFERASE POLYPEPTIDE 3	252	1.02655	0.0240998	Yes
7915	ALDEHYDE DEHYDROGENASE 5 FAMILY, MEMBER A1 (SUCCINATE-SEMIALDEHYDE DEHYDROGENASE)	260	1.01882	0.0245303	Yes
84293	CHROMOSOME 10 OPEN READING FRAME 58	261	1.01843	0.0254684	Yes
51109	RETINOL DEHYDROGENASE 11 (ALL-TRANS AND 9-CIS)	273	0.995794	0.0256088	Yes
27258	LSM3 HOMOLOG, U6 SMALL NUCLEAR RNA ASSOCIATED (S. CEREVISIAE)	277	0.991546	0.0263294	Yes
3336	HEAT SHOCK 10KDA PROTEIN 1 (CHAPERONIN 10)	285	0.982048	0.0267599	Yes
51174	TUBULIN, DELTA 1	293	0.976607	0.0271904	Yes
1718	24-DEHYDROCHOLESTEROL REDUCTASE	295	0.974656	0.028056	Yes
55783	HYPOTHETICAL PROTEIN FLJ11171	300	0.971188	0.028704	Yes
7108	TRANSMEMBRANE 7 SUPERFAMILY MEMBER 2	306	0.96501	0.0292796	Yes
8503	PHOSPHOINOSITIDE-3-KINASE, REGULATORY SUBUNIT 3 (P55, GAMMA)	317	0.951386	0.0294925	Yes
401152	HCV F-TRANSACTIVATED PROTEIN 1	328	0.945714	0.0297055	Yes
10363	HIGH-MOBILITY GROUP 20A	329	0.944953	0.0306436	Yes
55588	INTERSEX-LIKE (DROSOPHILA)	332	0.940748	0.0314367	Yes
1622	DIAZEPAM BINDING INHIBITOR (GABA RECEPTOR MODULATOR, ACYL-COENZYME A BINDING PROTEIN)	341	0.935718	0.0317947	Yes
79717	PHOSPHOPANTOTHENOYLCYSTEINE SYNTHETASE	354	0.926993	0.0318626	Yes
58526	MID1 INTERACTING PROTEIN 1 (GASTRULATION SPECIFIC G12-LIKE (ZEBRAFISH))	365	0.917314	0.0320756	Yes
54749	EPENDYMIN RELATED PROTEIN 1 (ZEBRAFISH)	381	0.901464	0.031926	Yes
91368	SIMILAR TO RIKEN CDNA A430101B06 GENE	386	0.897322	0.0325741	Yes
57546	PYRUVATE DEHYDROGENASE PHOSPHATASE ISOENZYME 2	411	0.882569	0.0317719	Yes
6415	SELENOPROTEIN W, 1	414	0.88155	0.0325649	Yes
116843	CHROMOSOME 6 OPEN READING FRAME 192	431	0.86299	0.0323429	Yes
5825	ATP-BINDING CASSETTE, SUB-FAMILY D (ALD), MEMBER 3	438	0.857147	0.0328459	Yes
8799	PEROXISOMAL BIOGENESIS FACTOR 11B	445	0.854051	0.0333489	Yes
2539	GLUCOSE-6-PHOSPHATE DEHYDROGENASE	448	0.850235	0.034142	Yes
29796	UBIQUINOL-CYTOCHROME C REDUCTASE COMPLEX (7.2 KD)	470	0.834333	0.0335573	Yes
112487	CHROMOSOME 14 OPEN READING FRAME 126	497	0.821385	0.0326101	Yes
54107	POLYMERASE (DNA DIRECTED), EPSILON 3 (P17 SUBUNIT)	500	0.820515	0.0334032	Yes
6319	STEAROYL-COA DESATURASE (DELTA-9-DESATURASE)	518	0.81249	0.0331086	Yes
51540	SELENOCYSTEINE LYASE	519	0.812387	0.0340467	Yes
326625	METHYLMALONIC ACIDURIA (COBALAMIN DEFICIENCY) CBLB TYPE	532	0.801151	0.0341146	Yes
64149	CHROMOSOME 17 OPEN READING FRAME 75	559	0.781641	0.0331674	Yes
275	AMINOMETHYLTRANSFERASE (GLYCINE CLEAVAGE SYSTEM PROTEIN T)	572	0.775712	0.0332354	Yes
22868	KIAA0971	591	0.765264	0.0328683	Yes
59349	KELCH-LIKE 12 (DROSOPHILA)	600	0.760676	0.0332262	Yes
136647	CHROMOSOME 7 OPEN READING FRAME 11	614	0.749467	0.0332217	Yes
55148	CHROMOSOME 14 OPEN READING FRAME 130	615	0.749382	0.0341598	Yes
24137	KINESIN FAMILY MEMBER 4A	621	0.746031	0.0347353	Yes
9852	EPM2A (LAFORIN) INTERACTING PROTEIN 1	623	0.745728	0.0356009	Yes
339487	ZINC FINGER AND BTB DOMAIN CONTAINING 8 OPPOSITE STRAND	626	0.744728	0.036394	Yes
150737	HYPOTHETICAL PROTEIN FLJ30990	631	0.742101	0.037042	Yes
55326	1-ACYLGLYCEROL-3-PHOSPHATE O-ACYLTRANSFERASE 5 (LYSOPHOSPHATIDIC ACID ACYLTRANSFERASE, EPSILON)	633	0.740753	0.0379076	Yes
55954	ZINC FINGER, MATRIN TYPE 5	650	0.730935	0.0376855	Yes
2952	GLUTATHIONE S-TRANSFERASE THETA 1	652	0.72836	0.0385511	Yes
9749	PHOSPHATASE AND ACTIN REGULATOR 2	663	0.722401	0.038764	Yes
51596	CUTA DIVALENT CATION TOLERANCE HOMOLOG (E. COLI)	675	0.714198	0.0389045	Yes
23116	KIAA0423	677	0.713213	0.0397701	Yes
2305	FORKHEAD BOX M1	681	0.712539	0.0404906	Yes
51501	HYPOTHETICAL PROTEIN HSPC138	699	0.704925	0.040196	Yes
28512	NFKB INHIBITOR INTERACTING RAS-LIKE 1	710	0.700357	0.040409	Yes
5002	IMPRINTED POLYSPECIFIC MEMBRANE TRANSPORTER 1	730	0.692431	0.0399694	Yes
80227	WD REPEAT DOMAIN 71	737	0.691352	0.0404724	Yes
64853	CHROMOSOME 1 OPEN READING FRAME 80	740	0.691019	0.0412655	Yes
64427	HYPOTHETICAL PROTEIN FLJ12788	754	0.685734	0.0412609	Yes
5917	ARGINYL-TRNA SYNTHETASE	762	0.681408	0.0416914	Yes
64429	ZINC FINGER, DHHC-TYPE CONTAINING 6	775	0.677259	0.0417594	Yes
26007	DIHYDROXYACETONE KINASE 2 HOMOLOG (YEAST)	777	0.675006	0.0426249	Yes
11097	NUCLEOPORIN LIKE 2	787	0.671584	0.0429104	Yes
2021	ENDONUCLEASE G	793	0.670247	0.043486	Yes
28998	MITOCHONDRIAL RIBOSOMAL PROTEIN L13	829	0.659082	0.0418862	Yes
51649	MITOCHONDRIAL RIBOSOMAL PROTEIN S23	830	0.658934	0.0428242	Yes
90507	SECERNIN 2	839	0.65565	0.0431822	Yes
23322	KIAA1005 PROTEIN	846	0.652924	0.0436853	Yes
54505	DEAH (ASP-GLU-ALA-HIS) BOX POLYPEPTIDE 29	863	0.646904	0.0434632	Yes
54927	COILED-COIL-HELIX-COILED-COIL-HELIX DOMAIN CONTAINING 3	868	0.646013	0.0441112	Yes
79053	ASPARAGINE-LINKED GLYCOSYLATION 8 HOMOLOG (YEAST, ALPHA-1,3-GLUCOSYLTRANSFERASE)	869	0.645957	0.0450493	Yes
10947	ADAPTOR-RELATED PROTEIN COMPLEX 3, MU 2 SUBUNIT	892	0.636679	0.0443921	Yes
2956	MUTS HOMOLOG 6 (E. COLI)	894	0.636225	0.0452577	Yes
7879	RAB7, MEMBER RAS ONCOGENE FAMILY	901	0.634687	0.0457607	Yes
10827	CHROMOSOME 5 OPEN READING FRAME 3	902	0.634578	0.0466988	Yes
65084	HYPOTHETICAL PROTEIN FLJ22104	916	0.630319	0.0466943	Yes
9802	DAZ ASSOCIATED PROTEIN 2	922	0.627962	0.0472698	Yes
26263	F-BOX PROTEIN 22	923	0.627948	0.0482079	Yes
373156	GLUTATHIONE S-TRANSFERASE SUBUNIT 13 HOMOLOG	933	0.625547	0.0484934	Yes
92342	CHROMOSOME 1 OPEN READING FRAME 156	960	0.619087	0.0475462	Yes
9551	ATP SYNTHASE, H+ TRANSPORTING, MITOCHONDRIAL F0 COMPLEX, SUBUNIT F2	978	0.614305	0.0472516	Yes
51538	ZINC FINGER, CCHC DOMAIN CONTAINING 17	993	0.606884	0.0471745	Yes
2800	GOLGI AUTOANTIGEN, GOLGIN SUBFAMILY A, 1	1005	0.604271	0.047315	Yes
79639	TRANSMEMBRANE PROTEIN 53	1008	0.603322	0.048108	Yes
1069	CENTRIN, EF-HAND PROTEIN, 2	1012	0.602544	0.0488286	Yes
9765	ZINC FINGER, FYVE DOMAIN CONTAINING 16	1028	0.59854	0.048679	Yes
29089	UBIQUITIN-CONJUGATING ENZYME E2T (PUTATIVE)	1042	0.595167	0.0486744	Yes
55732	CHROMOSOME 1 OPEN READING FRAME 112	1047	0.593327	0.0493225	Yes
7259	TSPY-LIKE 1	1061	0.589771	0.0493179	Yes
83695	CHROMOSOME 12 OPEN READING FRAME 32	1070	0.587488	0.0496759	Yes
10403	KINETOCHORE ASSOCIATED 2	1081	0.58478	0.0498889	Yes
4725	NADH DEHYDROGENASE (UBIQUINONE) FE-S PROTEIN 5, 15KDA (NADH-COENZYME Q REDUCTASE)	1088	0.58369	0.0503919	Yes
420	ADP-RIBOSYLTRANSFERASE 4 (DOMBROCK BLOOD GROUP)	1090	0.583429	0.0512575	Yes
7389	UROPORPHYRINOGEN DECARBOXYLASE	1091	0.583133	0.0521956	Yes
9410	WD REPEAT DOMAIN 57 (U5 SNRNP SPECIFIC)	1102	0.581286	0.0524086	Yes
55852	TESTIS EXPRESSED SEQUENCE 2	1103	0.581122	0.0533466	Yes
126231	ZINC FINGER PROTEIN 573	1127	0.573586	0.052617	Yes
27101	CALCYCLIN BINDING PROTEIN	1133	0.572104	0.0531925	Yes
11157	LSM6 HOMOLOG, U6 SMALL NUCLEAR RNA ASSOCIATED (S. CEREVISIAE)	1148	0.5685	0.0531154	Yes
8349	HISTONE 1, H2BB	1150	0.566454	0.053981	Yes
55967	NADH DEHYDROGENASE (UBIQUINONE) 1 ALPHA SUBCOMPLEX, 12	1159	0.564198	0.054339	Yes
79823	CHROMOSOME 2 OPEN READING FRAME 34	1183	0.55727	0.0536093	Yes
65993	MITOCHONDRIAL RIBOSOMAL PROTEIN S34	1188	0.55653	0.0542574	Yes
54840	APRATAXIN	1199	0.554857	0.0544704	Yes
81889	FUMARYLACETOACETATE HYDROLASE DOMAIN CONTAINING 1	1205	0.553691	0.0550459	Yes
1836	SOLUTE CARRIER FAMILY 26 (SULFATE TRANSPORTER), MEMBER 2	1212	0.550663	0.0555489	Yes
400569	SIMILAR TO HSPC296	1215	0.550258	0.056342	Yes
29071	C1GALT1-SPECIFIC CHAPERONE 1	1217	0.549961	0.0572076	Yes
126272	EID-2-LIKE INHIBITOR OF DIFFERENTIATION-3	1247	0.541097	0.0560428	Yes
23592	LEM DOMAIN CONTAINING 3	1248	0.540957	0.0569809	Yes
54458	PROLINE RICH 13	1251	0.540299	0.057774	Yes
51747	ACID-INDUCIBLE PHOSPHOPROTEIN	1258	0.538742	0.058277	Yes
123688	SIMILAR TO RIKEN CDNA C630028N24 GENE	1274	0.534531	0.0581274	Yes
121642	ALKB, ALKYLATION REPAIR HOMOLOG 2 (E. COLI)	1315	0.524643	0.0561651	Yes
27292	DIMETHYLADENOSINE TRANSFERASE	1316	0.524612	0.0571031	Yes
4738	NEURAL PRECURSOR CELL EXPRESSED, DEVELOPMENTALLY DOWN-REGULATED 8	1330	0.521367	0.0570986	Yes
11160	SPFH DOMAIN FAMILY, MEMBER 2	1343	0.519672	0.0571665	Yes
9488	PHOSPHATIDYLINOSITOL GLYCAN, CLASS B	1344	0.519487	0.0581046	Yes
10654	PHOSPHOMEVALONATE KINASE	1358	0.51806	0.0581001	Yes
79783	CHROMOSOME 7 OPEN READING FRAME 10	1360	0.517554	0.0589656	Yes
51575	CHROMOSOME 20 OPEN READING FRAME 6	1367	0.515285	0.0594687	Yes
7508	XERODERMA PIGMENTOSUM, COMPLEMENTATION GROUP C	1383	0.510961	0.0593191	Yes
85025	TRANSMEMBRANE PROTEIN 60	1386	0.510202	0.0601121	Yes
9491	PROTEASOME (PROSOME, MACROPAIN) INHIBITOR SUBUNIT 1 (PI31)	1391	0.509162	0.0607602	Yes
64147	KINESIN FAMILY MEMBER 9	1392	0.508708	0.0616983	Yes
51144	HYDROXYSTEROID (17-BETA) DEHYDROGENASE 12	1406	0.505865	0.0616937	Yes
22916	NUCLEAR CAP BINDING PROTEIN SUBUNIT 2, 20KDA	1409	0.505704	0.0624868	Yes
222171	HYPOTHETICAL PROTEIN LOC222171	1424	0.501893	0.0624097	Yes
6059	ATP-BINDING CASSETTE, SUB-FAMILY E (OABP), MEMBER 1	1429	0.501123	0.0630577	Yes
1059	CENTROMERE PROTEIN B, 80KDA	1430	0.500888	0.0639958	Yes
57019	CYTOKINE INDUCED APOPTOSIS INHIBITOR 1	1484	0.488895	0.0610908	Yes
23600	ALPHA-METHYLACYL-COA RACEMASE	1487	0.488278	0.0618839	Yes
56935	FN5 PROTEIN	1489	0.487325	0.0627495	Yes
55172	CHROMOSOME 14 OPEN READING FRAME 104	1491	0.487105	0.0636151	Yes
10614	HEXAMETHYLENE BIS-ACETAMIDE INDUCIBLE 1	1504	0.484384	0.063683	Yes
51073	MITOCHONDRIAL RIBOSOMAL PROTEIN L4	1507	0.483568	0.0644761	Yes
282991	BIOGENESIS OF LYSOSOME-RELATED ORGANELLES COMPLEX-1, SUBUNIT 2	1511	0.483033	0.0651966	Yes
9667	SCAFFOLD ATTACHMENT FACTOR B2	1525	0.479769	0.0651921	Yes
196383	HYPOTHETICAL PROTEIN MGC7036	1533	0.477967	0.0656226	Yes
51010	EXOSOME COMPONENT 3	1537	0.477722	0.0663431	Yes
6643	SORTING NEXIN 2	1538	0.47768	0.0672812	Yes
51287	COILED-COIL-HELIX-COILED-COIL-HELIX DOMAIN CONTAINING 8	1545	0.477103	0.0677842	Yes
93343	HYPOTHETICAL PROTEIN BC011840	1556	0.47513	0.0679972	Yes
7381	UBIQUINOL-CYTOCHROME C REDUCTASE BINDING PROTEIN	1561	0.473864	0.0686453	Yes
55004	HYPOTHETICAL PROTEIN FLJ20625	1563	0.473617	0.0695108	Yes
873	CARBONYL REDUCTASE 1	1566	0.47298	0.0703039	Yes
6767	SUPPRESSION OF TUMORIGENICITY 13 (COLON CARCINOMA) (HSP70 INTERACTING PROTEIN)	1588	0.469037	0.0697192	Yes
57570	TRM5 TRNA METHYLTRANSFERASE 5 HOMOLOG (S. CEREVISIAE)	1600	0.466443	0.0698597	Yes
50813	COP9 CONSTITUTIVE PHOTOMORPHOGENIC HOMOLOG SUBUNIT 7A (ARABIDOPSIS)	1602	0.466205	0.0707253	Yes
51077	CHROMOSOME 14 OPEN READING FRAME 111	1611	0.464288	0.0710833	Yes
80237	ELONGATION FACTOR RNA POLYMERASE II-LIKE 3	1620	0.462854	0.0714413	Yes
84328	LEUCINE ZIPPER AND CTNNBIP1 DOMAIN CONTAINING	1626	0.462434	0.0720168	Yes
26098	CHROMOSOME 10 OPEN READING FRAME 137	1668	0.452217	0.069982	Yes
64793	COILED-COIL DOMAIN CONTAINING 21	1685	0.448894	0.0697598	Yes
10026	PHOSPHATIDYLINOSITOL GLYCAN, CLASS K	1687	0.448882	0.0706254	Yes
11079	RER1 RETENTION IN ENDOPLASMIC RETICULUM 1 HOMOLOG (S. CEREVISIAE)	1688	0.448865	0.0715635	Yes
9636	INTERFERON, ALPHA-INDUCIBLE PROTEIN (CLONE IFI-15K)	1699	0.447306	0.0717765	Yes
79133	CHROMOSOME 20 OPEN READING FRAME 7	1700	0.447302	0.0727146	Yes
23299	BICAUDAL D HOMOLOG 2 (DROSOPHILA)	1707	0.446	0.0732176	Yes
22858	INTESTINAL CELL (MAK-LIKE) KINASE	1709	0.445385	0.0740832	Yes
54554	WD REPEAT DOMAIN 5B	1710	0.444945	0.0750213	Yes
130916	MTERF DOMAIN CONTAINING 2	1714	0.443928	0.0757418	Yes
8655	DYNEIN, LIGHT CHAIN, LC8-TYPE 1	1716	0.443149	0.0766074	Yes
5434	POLYMERASE (RNA) II (DNA DIRECTED) POLYPEPTIDE E, 25KDA	1732	0.438957	0.0764578	Yes
80789	KIAA1698	1739	0.438114	0.0769608	Yes
56647	CDK INHIBITOR P21 BINDING PROTEIN	1749	0.435316	0.0772463	Yes
132789	GLUCOSAMINE-6-PHOSPHATE DEAMINASE 2	1751	0.43523	0.0781119	Yes
5546	PAPILLARY RENAL CELL CARCINOMA (TRANSLOCATION-ASSOCIATED)	1784	0.430961	0.0767296	Yes
55166	CHROMOSOME 6 OPEN READING FRAME 139	1791	0.430175	0.0772326	Yes
112970	KTI12 HOMOLOG, CHROMATIN ASSOCIATED (S. CEREVISIAE)	1793	0.430131	0.0780982	Yes
9493	KINESIN FAMILY MEMBER 23	1795	0.429742	0.0789638	Yes
166	AMINO-TERMINAL ENHANCER OF SPLIT	1796	0.42965	0.0799019	Yes
10640	EXOCYST COMPLEX COMPONENT 5	1816	0.426695	0.0794622	Yes
63892	THYROID ADENOMA ASSOCIATED	1818	0.426564	0.0803278	Yes
8529	CYTOCHROME P450, FAMILY 4, SUBFAMILY F, POLYPEPTIDE 2	1825	0.425897	0.0808308	Yes
11066	U11/U12 SNRNP 35K	1829	0.424856	0.0815514	Yes
28974	HSPC023 PROTEIN	1843	0.421453	0.0815468	Yes
7013	TELOMERIC REPEAT BINDING FACTOR (NIMA-INTERACTING) 1	1844	0.421217	0.0824849	Yes
1434	CSE1 CHROMOSOME SEGREGATION 1-LIKE (YEAST)	1854	0.420074	0.0827704	Yes
7270	TRANSCRIPTION TERMINATION FACTOR, RNA POLYMERASE I	1861	0.419272	0.0832734	Yes
22826	DNAJ (HSP40) HOMOLOG, SUBFAMILY C, MEMBER 8	1864	0.419034	0.0840665	Yes
51619	UBIQUITIN-CONJUGATING ENZYME E2D 4 (PUTATIVE)	1882	0.416047	0.0837719	Yes
90809	TRANSMEMBRANE PROTEIN 55B	1903	0.413179	0.0832598	Yes
285381	ZINC FINGER, CSL-TYPE CONTAINING 2	1911	0.412189	0.0836903	Yes
201627	HYPOTHETICAL PROTEIN FLJ34969	1912	0.411755	0.0846284	Yes
163050	ZINC FINGER PROTEIN 564	1924	0.40972	0.0847688	Yes
9997	SCO CYTOCHROME OXIDASE DEFICIENT HOMOLOG 2 (YEAST)	1947	0.405918	0.0841117	Yes
9453	GERANYLGERANYL DIPHOSPHATE SYNTHASE 1	1976	0.400986	0.0830194	Yes
10607	TRANSDUCIN (BETA)-LIKE 3	1978	0.400881	0.083885	Yes
64960	MITOCHONDRIAL RIBOSOMAL PROTEIN S15	1998	0.396796	0.0834454	Yes
91107	TRIPARTITE MOTIF-CONTAINING 47	2002	0.396071	0.084166	Yes
5051	PLATELET-ACTIVATING FACTOR ACETYLHYDROLASE 2, 40KDA	2013	0.394947	0.0843789	Yes
10465	PEPTIDYLPROLYL ISOMERASE H (CYCLOPHILIN H)	2019	0.39438	0.0849545	Yes
4598	MEVALONATE KINASE (MEVALONIC ACIDURIA)	2032	0.391985	0.0850224	Yes
56943	ENHANCER OF YELLOW 2 HOMOLOG (DROSOPHILA)	2039	0.39101	0.0855254	Yes
10196	PROTEIN ARGININE METHYLTRANSFERASE 3	2051	0.389318	0.0856659	Yes
55706	TRANSMEMBRANE PROTEIN 48	2052	0.389235	0.086604	Yes
128240	APOLIPOPROTEIN A-I BINDING PROTEIN	2053	0.389199	0.0875421	Yes
2632	GLUCAN (1,4-ALPHA-), BRANCHING ENZYME 1 (GLYCOGEN BRANCHING ENZYME, ANDERSEN DISEASE, GLYCOGEN STORAGE DISEASE TYPE IV)	2060	0.38671	0.0880451	Yes
6166	RIBOSOMAL PROTEIN L36A-LIKE	2067	0.386014	0.0885481	Yes
2739	GLYOXALASE I	2082	0.382643	0.088471	Yes
79573	TETRATRICOPEPTIDE REPEAT DOMAIN 13	2085	0.382361	0.0892641	Yes
5869	RAB5B, MEMBER RAS ONCOGENE FAMILY	2109	0.379539	0.0885344	Yes
2237	FLAP STRUCTURE-SPECIFIC ENDONUCLEASE 1	2111	0.379387	0.0894	Yes
64943	5'-NUCLEOTIDASE DOMAIN CONTAINING 2	2118	0.3789	0.089903	Yes
5716	PROTEASOME (PROSOME, MACROPAIN) 26S SUBUNIT, NON-ATPASE, 10	2124	0.377917	0.0904786	Yes
10146	RAS-GTPASE-ACTIVATING PROTEIN SH3-DOMAIN-BINDING PROTEIN	2126	0.377643	0.0913441	Yes
387921	HYPOTHETICAL PROTEIN LOC283506	2151	0.373237	0.090542	Yes
2961	GENERAL TRANSCRIPTION FACTOR IIE, POLYPEPTIDE 2, BETA 34KDA	2159	0.371933	0.0909725	Yes
9973	COPPER CHAPERONE FOR SUPEROXIDE DISMUTASE	2161	0.371628	0.091838	Yes
126823	KELCH/ANKYRIN REPEAT CONTAINING CYCLIN A1 INTERACTING PROTEIN	2181	0.368762	0.0913984	Yes
5566	PROTEIN KINASE, CAMP-DEPENDENT, CATALYTIC, ALPHA	2188	0.36775	0.0919014	Yes
79654	HECT DOMAIN CONTAINING 3	2198	0.366589	0.0921869	Yes
10460	TRANSFORMING, ACIDIC COILED-COIL CONTAINING PROTEIN 3	2199	0.36649	0.093125	Yes
57085	ANGIOTENSIN II RECEPTOR-ASSOCIATED PROTEIN	2210	0.364778	0.093338	Yes
7571	ZINC FINGER PROTEIN 19 (KOX 12)	2285	0.354369	0.0889103	Yes
79135	HYPOTHETICAL PROTEIN MGC4825	2288	0.35407	0.0897033	Yes
84514	HOMOLOG OF MOUSE LGP1	2291	0.353784	0.0904964	Yes
6631	SMALL NUCLEAR RIBONUCLEOPROTEIN POLYPEPTIDE C	2309	0.351319	0.0902018	Yes
11222	MITOCHONDRIAL RIBOSOMAL PROTEIN L3	2312	0.351047	0.0909949	Yes
122509	FAMILY WITH SEQUENCE SIMILARITY 14, MEMBER B	2321	0.350171	0.0913528	Yes
55791	CHROMOSOME 1 OPEN READING FRAME 103	2323	0.349634	0.0922184	Yes
6390	SUCCINATE DEHYDROGENASE COMPLEX, SUBUNIT B, IRON SULFUR (IP)	2328	0.349107	0.0928665	Yes
90826	HYPOTHETICAL PROTEIN BC004337	2337	0.34773	0.0932245	Yes
25824	PEROXIREDOXIN 5	2340	0.347411	0.0940175	Yes
493	ATPASE, CA++ TRANSPORTING, PLASMA MEMBRANE 4	2360	0.342769	0.0935779	Yes
80185	CHROMOSOME 8 OPEN READING FRAME 41	2368	0.341421	0.0940084	Yes
131118	DNAJ (HSP40) HOMOLOG, SUBFAMILY C, MEMBER 19	2371	0.341038	0.0948015	Yes
4179	CD46 ANTIGEN, COMPLEMENT REGULATORY PROTEIN	2380	0.340232	0.0951595	Yes
10291	SPLICING FACTOR 3A, SUBUNIT 1, 120KDA	2392	0.33845	0.0952999	Yes
4830	NON-METASTATIC CELLS 1, PROTEIN (NM23A) EXPRESSED IN	2396	0.337863	0.0960205	Yes
79646	PANTOTHENATE KINASE 3	2412	0.336518	0.0958709	Yes
9016	SOLUTE CARRIER FAMILY 25 (MITOCHONDRIAL CARRIER, BRAIN), MEMBER 14	2414	0.336449	0.0967365	Yes
57017	COENZYME Q9 HOMOLOG (YEAST)	2419	0.335551	0.0973845	Yes
6742	SINGLE-STRANDED DNA BINDING PROTEIN 1	2425	0.33475	0.0979601	Yes
10393	ANAPHASE PROMOTING COMPLEX SUBUNIT 10	2430	0.334418	0.0986081	Yes
5877	RAB INTERACTING FACTOR	2433	0.334186	0.0994012	Yes
78988	MITOCHONDRIAL RIBOSOMAL PROTEIN 63	2441	0.333462	0.0998317	Yes
10162	O-ACYLTRANSFERASE (MEMBRANE BOUND) DOMAIN CONTAINING 5	2444	0.333283	0.100625	Yes
79701	HYPOTHETICAL PROTEIN FLJ22222	2452	0.331876	0.101055	Yes
57062	DEAD (ASP-GLU-ALA-ASP) BOX POLYPEPTIDE 24	2455	0.331199	0.101848	Yes
54602	NEDD4 FAMILY INTERACTING PROTEIN 2	2459	0.330722	0.102569	Yes
7520	X-RAY REPAIR COMPLEMENTING DEFECTIVE REPAIR IN CHINESE HAMSTER CELLS 5 (DOUBLE-STRAND-BREAK REJOINING; KU AUTOANTIGEN, 80KDA)	2483	0.327857	0.101839	Yes
3006	HISTONE 1, H1C	2492	0.326952	0.102197	Yes
130752	MALATE DEHYDROGENASE 1B, NAD (SOLUBLE)	2500	0.325751	0.102628	Yes
29881	NPC1 (NIEMANN-PICK DISEASE, TYPE C1, GENE)-LIKE 1	2502	0.325145	0.103493	Yes
5189	PEROXISOME BIOGENESIS FACTOR 1	2510	0.324687	0.103924	Yes
29928	TRANSLOCASE OF INNER MITOCHONDRIAL MEMBRANE 22 HOMOLOG (YEAST)	2518	0.323669	0.104354	Yes
5147	PHOSPHODIESTERASE 6D, CGMP-SPECIFIC, ROD, DELTA	2528	0.322496	0.10464	Yes
51265	CYCLIN-DEPENDENT KINASE-LIKE 3	2572	0.316116	0.10246	Yes
9669	EUKARYOTIC TRANSLATION INITIATION FACTOR 5B	2575	0.315636	0.103253	Yes
27175	TUBULIN, GAMMA 2	2578	0.315457	0.104046	Yes
79680	HYPOTHETICAL PROTEIN FLJ21125	2584	0.315017	0.104622	Yes
55327	LIN-7 HOMOLOG C (C. ELEGANS)	2597	0.313625	0.10469	Yes
65082	VACUOLAR PROTEIN SORTING 33A (YEAST)	2599	0.313524	0.105555	Yes
64802	NICOTINAMIDE NUCLEOTIDE ADENYLYLTRANSFERASE 1	2600	0.31347	0.106493	Yes
1185	CHLORIDE CHANNEL 6	2604	0.312945	0.107214	Yes
93627	HYPOTHETICAL PROTEIN MGC16169	2607	0.312431	0.108007	Yes
10038	POLY (ADP-RIBOSE) POLYMERASE FAMILY, MEMBER 2	2623	0.31084	0.107857	Yes
55313	HYPOTHETICAL PROTEIN FLJ11151	2624	0.310747	0.108795	Yes
23587	CHROMOSOME 17 OPEN READING FRAME 81	2630	0.310022	0.109371	Yes
998	CELL DIVISION CYCLE 42 (GTP BINDING PROTEIN, 25KDA)	2650	0.308463	0.108931	Yes
57169	ZINC FINGER, NFX1-TYPE CONTAINING 1	2656	0.307784	0.109507	Yes
8460	TYROSYLPROTEIN SULFOTRANSFERASE 1	2674	0.304149	0.109212	Yes
85476	HYPOTHETICAL PROTEIN FLJ12662	2683	0.302994	0.10957	Yes
81892	CHROMOSOME 14 OPEN READING FRAME 156	2707	0.300344	0.10884	Yes
6810	SYNTAXIN 4A (PLACENTAL)	2712	0.300033	0.109489	Yes
55135	WD REPEAT DOMAIN 79	2720	0.299179	0.109919	Yes
4976	OPTIC ATROPHY 1 (AUTOSOMAL DOMINANT)	2739	0.296537	0.109552	Yes
10180	RNA BINDING MOTIF PROTEIN 6	2755	0.294723	0.109402	Yes
10005	ACYL-COA THIOESTERASE 8	2770	0.292491	0.109325	Yes
8846	ALKB, ALKYLATION REPAIR HOMOLOG 1 (E. COLI)	2797	0.288339	0.108378	Yes
84274	COENZYME Q5 HOMOLOG, METHYLTRANSFERASE (YEAST)	2804	0.286898	0.108881	Yes
132320	HYPOTHETICAL PROTEIN FLJ30655	2814	0.285836	0.109167	Yes
51081	MITOCHONDRIAL RIBOSOMAL PROTEIN S7	2819	0.285308	0.109815	Yes
127253	CHROMOSOME 1 OPEN READING FRAME 171	2835	0.283015	0.109665	Yes
259287	TASTE RECEPTOR, TYPE 2, MEMBER 41	2837	0.282824	0.110531	Yes
154791	HYPOTHETICAL PROTEIN HSPC268	2840	0.282608	0.111324	Yes
84516	DYNACTIN 5 (P25)	2846	0.282124	0.111899	Yes
7126	TUMOR NECROSIS FACTOR, ALPHA-INDUCED PROTEIN 1 (ENDOTHELIAL)	2854	0.281186	0.11233	Yes
6814	SYNTAXIN BINDING PROTEIN 3	2888	0.27768	0.110875	Yes
197370	NON-SMC ELEMENT 1 HOMOLOG (S. CEREVISIAE)	2900	0.276093	0.111015	Yes
221150	CHROMOSOME 13 OPEN READING FRAME 3	2902	0.275788	0.111881	Yes
284004	HEXOSAMINIDASE (GLYCOSYL HYDROLASE FAMILY 20, CATALYTIC DOMAIN) CONTAINING	2909	0.27518	0.112384	Yes
55163	PYRIDOXINE 5'-PHOSPHATE OXIDASE	2910	0.275101	0.113322	Yes
10963	STRESS-INDUCED-PHOSPHOPROTEIN 1 (HSP70/HSP90-ORGANIZING PROTEIN)	2913	0.274662	0.114115	Yes
10159	ATPASE, H+ TRANSPORTING, LYSOSOMAL ACCESSORY PROTEIN 2	2937	0.272002	0.113385	Yes
55624	PROTEIN O-LINKED MANNOSE BETA1,2-N-ACETYLGLUCOSAMINYLTRANSFERASE	2946	0.271281	0.113743	Yes
908	CHAPERONIN CONTAINING TCP1, SUBUNIT 6A (ZETA 1)	2952	0.270672	0.114319	Yes
4668	N-ACETYLGALACTOSAMINIDASE, ALPHA-	2969	0.268921	0.114097	Yes
5226	PHOSPHOGLUCONATE DEHYDROGENASE	2972	0.268662	0.11489	Yes
222658	CHROMOSOME 6 OPEN READING FRAME 69	2980	0.267509	0.11532	Yes
51002	TP53RK BINDING PROTEIN	2986	0.266957	0.115896	Yes
403	ADP-RIBOSYLATION FACTOR-LIKE 3	2991	0.266486	0.116544	Yes
5005	OROSOMUCOID 2	2994	0.26589	0.117337	Yes
55743	CHECKPOINT WITH FORKHEAD AND RING FINGER DOMAINS	2995	0.265846	0.118275	Yes
51098	INTRAFLAGELLAR TRANSPORT 52 HOMOLOG (CHLAMYDOMONAS)	3000	0.265072	0.118923	Yes
8343	HISTONE 1, H2BD	3011	0.263659	0.119136	Yes
6427	SPLICING FACTOR, ARGININE/SERINE-RICH 2	3018	0.262777	0.119639	Yes
51248	PDZ DOMAIN CONTAINING 11	3027	0.26157	0.119997	Yes
10195	ASPARAGINE-LINKED GLYCOSYLATION 3 HOMOLOG (YEAST, ALPHA-1,3-MANNOSYLTRANSFERASE)	3037	0.259981	0.120283	Yes
84909	CHROMOSOME 9 OPEN READING FRAME 3	3050	0.25862	0.120351	Yes
4811	NIDOGEN 1	3068	0.256978	0.120056	Yes
54901	CDK5 REGULATORY SUBUNIT ASSOCIATED PROTEIN 1-LIKE 1	3073	0.256811	0.120704	Yes
51203	NUCLEOLAR AND SPINDLE ASSOCIATED PROTEIN 1	3076	0.256506	0.121497	Yes
6633	SMALL NUCLEAR RIBONUCLEOPROTEIN D2 POLYPEPTIDE 16.5KDA	3081	0.255261	0.122145	Yes
11102	RIBONUCLEASE P 14KDA SUBUNIT	3117	0.252511	0.120545	Yes
10594	PRP8 PRE-MRNA PROCESSING FACTOR 8 HOMOLOG (YEAST)	3118	0.252483	0.121484	Yes
2822	GLYCOSYLPHOSPHATIDYLINOSITOL SPECIFIC PHOSPHOLIPASE D1	3123	0.251913	0.122132	Yes
284695	HYPOTHETICAL PROTEIN FLJ20403 SIMILAR TO ZINC FINGER PROTEIN 326	3128	0.251431	0.12278	Yes
10897	YIP1 INTERACTING FACTOR HOMOLOG A (S. CEREVISIAE)	3141	0.250533	0.122848	Yes
10121	ARP1 ACTIN-RELATED PROTEIN 1 HOMOLOG A, CENTRACTIN ALPHA (YEAST)	3175	0.247493	0.121393	Yes
7917	HLA-B ASSOCIATED TRANSCRIPT 3	3189	0.245724	0.121388	Yes
5001	ORIGIN RECOGNITION COMPLEX, SUBUNIT 5-LIKE (YEAST)	3195	0.245315	0.121964	Yes
5274	SERPIN PEPTIDASE INHIBITOR, CLADE I (NEUROSERPIN), MEMBER 1	3213	0.242571	0.121669	Yes
7733	ZINC FINGER PROTEIN 180 (HHZ168)	3241	0.240083	0.120649	Yes
5723	PHOSPHOSERINE PHOSPHATASE	3246	0.23968	0.121297	Yes
9131	PROGRAMMED CELL DEATH 8 (APOPTOSIS-INDUCING FACTOR)	3251	0.239445	0.121946	Yes
26994	RING FINGER PROTEIN 11	3266	0.23836	0.121868	Yes
84335	AKT1 SUBSTRATE 1 (PROLINE-RICH)	3277	0.237163	0.122081	Yes
79719	HYPOTHETICAL PROTEIN FLJ11506	3301	0.23533	0.121352	Yes
51218	GLUTAREDOXIN 5 HOMOLOG (S. CEREVISIAE)	3303	0.235136	0.122217	Yes
8379	MAD1 MITOTIC ARREST DEFICIENT-LIKE 1 (YEAST)	3305	0.235011	0.123083	Yes
90204	ZINC FINGER, SWIM-TYPE CONTAINING 1	3317	0.233629	0.123223	Yes
5715	PROTEASOME (PROSOME, MACROPAIN) 26S SUBUNIT, NON-ATPASE, 9	3327	0.232396	0.123509	Yes
26121	PRP31 PRE-MRNA PROCESSING FACTOR 31 HOMOLOG (YEAST)	3353	0.230236	0.122634	Yes
7390	UROPORPHYRINOGEN III SYNTHASE (CONGENITAL ERYTHROPOIETIC PORPHYRIA)	3367	0.229462	0.12263	Yes
55293	UBIQUITIN-CONJUGATING ENZYME E2-LIKE	3372	0.228932	0.123278	Yes
57474	ZINC FINGER PROTEIN 490	3391	0.227201	0.122911	Yes
79017	CHROMOSOME 7 OPEN READING FRAME 24	3417	0.225154	0.122036	Yes
64863	METHYLTRANSFERASE LIKE 4	3430	0.224402	0.122104	Yes
81928	CDK5 AND ABL ENZYME SUBSTRATE 2	3450	0.222897	0.121664	Yes
116115	ZINC FINGER PROTEIN 526	3457	0.222448	0.122167	Yes
85437	ZINC FINGER CCHC-TYPE AND RNA BINDING MOTIF 1	3461	0.222073	0.122888	Yes
55353	LYSOSOMAL ASSOCIATED PROTEIN TRANSMEMBRANE 4 BETA	3477	0.2212	0.122738	Yes
80167	HYPOTHETICAL PROTEIN FLJ21106	3481	0.220819	0.123459	Yes
8517	INHIBITOR OF KAPPA LIGHT POLYPEPTIDE GENE ENHANCER IN B-CELLS, KINASE GAMMA	3484	0.22053	0.124252	Yes
51504	HYPOTHETICAL PROTEIN HSPC152	3499	0.218779	0.124175	Yes
83443	SPLICING FACTOR 3B, SUBUNIT 5, 10KDA	3513	0.218044	0.12417	Yes
4696	NADH DEHYDROGENASE (UBIQUINONE) 1 ALPHA SUBCOMPLEX, 3, 9KDA	3517	0.217651	0.124891	Yes
84650	EMOPAMIL BINDING PROTEIN-LIKE	3539	0.215996	0.124306	Yes
9069	CLAUDIN 12	3547	0.215296	0.124737	Yes
9117	SEC22 VESICLE TRAFFICKING PROTEIN-LIKE 3 (S. CEREVISIAE)	3548	0.215247	0.125675	Yes
4296	MITOGEN-ACTIVATED PROTEIN KINASE KINASE KINASE 11	3550	0.215137	0.12654	Yes
157506	RETINOL DEHYDROGENASE 10 (ALL-TRANS)	3552	0.214942	0.127406	Yes
60481	ELOVL FAMILY MEMBER 5, ELONGATION OF LONG CHAIN FATTY ACIDS (FEN1/ELO2, SUR4/ELO3-LIKE, YEAST)	3554	0.214738	0.128271	Yes
140831	ZINC FINGER, SWIM-TYPE CONTAINING 3	3557	0.214567	0.129064	Yes
92104	HYPOTHETICAL PROTEIN FLJ13946	3595	0.210707	0.12732	Yes
1017	CYCLIN-DEPENDENT KINASE 2	3604	0.209846	0.127678	Yes
3735	LYSYL-TRNA SYNTHETASE	3621	0.207651	0.127456	Yes
58497	PRUNE HOMOLOG (DROSOPHILA)	3628	0.207282	0.127959	Yes
29893	PSMC3 INTERACTING PROTEIN	3636	0.206491	0.128389	Yes
113174	SERUM AMYLOID A-LIKE 1	3648	0.205705	0.12853	Yes
5119	PROCOLLAGEN (TYPE III) N-ENDOPEPTIDASE	3649	0.205686	0.129468	Yes
6732	SFRS PROTEIN KINASE 1	3661	0.204902	0.129608	Yes
9942	XYLULOKINASE HOMOLOG (H. INFLUENZAE)	3665	0.204659	0.130329	Yes
57038	ARGINYL-TRNA SYNTHETASE-LIKE	3670	0.20437	0.130977	Yes
55857	CHROMOSOME 20 OPEN READING FRAME 19	3673	0.204237	0.13177	Yes
8438	RAD54-LIKE (S. CEREVISIAE)	3684	0.203416	0.131983	Yes
4836	N-MYRISTOYLTRANSFERASE 1	3691	0.202588	0.132486	Yes
4238	MICROFIBRILLAR-ASSOCIATED PROTEIN 3	3696	0.202287	0.133134	Yes
58155	POLYPYRIMIDINE TRACT BINDING PROTEIN 2	3713	0.200825	0.132912	Yes
83743	GLUTAMATE-RICH WD REPEAT CONTAINING 1	3720	0.200231	0.133415	Yes
9794	MASTERMIND-LIKE 1 (DROSOPHILA)	3722	0.200217	0.13428	Yes
23276	KELCH-LIKE 18 (DROSOPHILA)	3724	0.200066	0.135146	Yes
93377	TRANSMEMBRANE PROTEIN 10	3725	0.19997	0.136084	Yes
285367	RNA PSEUDOURIDYLATE SYNTHASE DOMAIN CONTAINING 3	3741	0.198429	0.135934	Yes
5004	OROSOMUCOID 1	3744	0.198083	0.136727	Yes
26024	PENTATRICOPEPTIDE REPEAT DOMAIN 1	3756	0.196456	0.136868	Yes
27433	TORSIN FAMILY 2, MEMBER A	3759	0.196348	0.137661	Yes
23517	SUPERKILLER VIRALICIDIC ACTIVITY 2-LIKE 2 (S. CEREVISIAE)	3763	0.195836	0.138381	Yes
9818	NUCLEOPORIN LIKE 1	3764	0.19574	0.13932	Yes
152185	COILED-COIL DOMAIN CONTAINING 52	3775	0.194744	0.139533	Yes
55054	ATG16 AUTOPHAGY RELATED 16-LIKE 1 (S. CEREVISIAE)	3789	0.193877	0.139528	Yes
1429	CRYSTALLIN, ZETA (QUINONE REDUCTASE)	3798	0.193194	0.139886	Yes
89978	ATP BINDING DOMAIN 4	3805	0.192661	0.140389	Yes
5425	POLYMERASE (DNA DIRECTED), DELTA 2, REGULATORY SUBUNIT 50KDA	3810	0.192384	0.141037	Yes
57805	KIAA1967	3829	0.190854	0.14067	Yes
7036	TRANSFERRIN RECEPTOR 2	3837	0.190423	0.1411	Yes
93621	MOF4 FAMILY ASSOCIATED PROTEIN 1	3844	0.18986	0.141603	Yes
90701	SEC11-LIKE 3 (S. CEREVISIAE)	3845	0.189825	0.142542	Yes
8935	SRC FAMILY ASSOCIATED PHOSPHOPROTEIN 2	3878	0.18715	0.141159	Yes
1861	TORSIN FAMILY 1, MEMBER A (TORSIN A)	3881	0.186876	0.141952	Yes
369	V-RAF MURINE SARCOMA 3611 VIRAL ONCOGENE HOMOLOG	3884	0.186471	0.142745	Yes
79602	ADIPONECTIN RECEPTOR 2	3892	0.185694	0.143176	Yes
10445	MICROSPHERULE PROTEIN 1	3915	0.183716	0.142519	Yes
4190	MALATE DEHYDROGENASE 1, NAD (SOLUBLE)	3921	0.182996	0.143094	Yes
83985	SPINSTER	3933	0.181931	0.143235	Yes
3396	IMMATURE COLON CARCINOMA TRANSCRIPT 1	3945	0.18152	0.143375	Yes
51276	ZINC FINGER PROTEIN 571	3958	0.180403	0.143443	Yes
5928	RETINOBLASTOMA BINDING PROTEIN 4	3962	0.17989	0.144164	Yes
10055	SUMO-1 ACTIVATING ENZYME SUBUNIT 1	3981	0.178291	0.143797	Yes
131616	TRANSMEMBRANE PROTEIN 42	3983	0.178158	0.144662	Yes
1209	CLEFT LIP AND PALATE ASSOCIATED TRANSMEMBRANE PROTEIN 1	4005	0.176795	0.144078	Yes
10245	TRANSLOCASE OF INNER MITOCHONDRIAL MEMBRANE 17 HOMOLOG B (YEAST)	4006	0.176553	0.145016	Yes
537	ATPASE, H+ TRANSPORTING, LYSOSOMAL ACCESSORY PROTEIN 1	4009	0.176297	0.145809	Yes
283232	TRANSMEMBRANE PROTEIN 80	4027	0.174984	0.145514	Yes
84196	HYPOTHETICAL PROTEIN FLJ11328	4032	0.174673	0.146162	Yes
23595	ORIGIN RECOGNITION COMPLEX, SUBUNIT 3-LIKE (YEAST)	4047	0.17315	0.146085	Yes
8803	SUCCINATE-COA LIGASE, ADP-FORMING, BETA SUBUNIT	4050	0.173009	0.146878	Yes
55847	CHROMOSOME 10 OPEN READING FRAME 70	4068	0.170975	0.146584	Yes
2280	FK506 BINDING PROTEIN 1A, 12KDA	4069	0.17096	0.147522	Yes
27339	PRP19/PSO4 PRE-MRNA PROCESSING FACTOR 19 HOMOLOG (S. CEREVISIAE)	4070	0.170881	0.14846	Yes
7511	X-PROLYL AMINOPEPTIDASE (AMINOPEPTIDASE P) 1, SOLUBLE	4071	0.170835	0.149398	Yes
57142	RETICULON 4	4073	0.170765	0.150263	Yes
9114	ATPASE, H+ TRANSPORTING, LYSOSOMAL 38KDA, V0 SUBUNIT D1	4079	0.170217	0.150839	Yes
10557	RIBONUCLEASE P/MRP 38KDA SUBUNIT	4083	0.169858	0.151559	Yes
25821	MITOCHONDRIAL TRANSLATION OPTIMIZATION 1 HOMOLOG (S. CEREVISIAE)	4121	0.166203	0.149815	Yes
10084	POLYGLUTAMINE BINDING PROTEIN 1	4135	0.165059	0.14981	Yes
192286	HIG1 DOMAIN FAMILY, MEMBER 2A	4136	0.165033	0.150748	Yes
84844	PHD FINGER PROTEIN 5A	4138	0.164816	0.151614	Yes
90410	INTRAFLAGELLAR TRANSPORT 20 HOMOLOG (CHLAMYDOMONAS)	4157	0.163147	0.151247	Yes
9101	UBIQUITIN SPECIFIC PEPTIDASE 8	4159	0.163017	0.152112	Yes
8435	STEROL O-ACYLTRANSFERASE 2	4176	0.161728	0.15189	Yes
115201	ATG4 AUTOPHAGY RELATED 4 HOMOLOG A (S. CEREVISIAE)	4192	0.160813	0.151741	Yes
6141	RIBOSOMAL PROTEIN L18	4215	0.159278	0.151083	Yes
80143	SUPPRESSOR OF IKK EPSILON	4247	0.157001	0.149774	Yes
11267	SNF8, ESCRT-II COMPLEX SUBUNIT, HOMOLOG (S. CEREVISIAE)	4256	0.15561	0.150132	Yes
11100	HETEROGENEOUS NUCLEAR RIBONUCLEOPROTEIN U-LIKE 1	4258	0.15553	0.150997	Yes
342908	ZINC FINGER PROTEIN 404	4260	0.155387	0.151863	Yes
5518	PROTEIN PHOSPHATASE 2 (FORMERLY 2A), REGULATORY SUBUNIT A (PR 65), ALPHA ISOFORM	4271	0.154532	0.152076	Yes
10190	THIOREDOXIN DOMAIN CONTAINING 9	4280	0.154029	0.152434	Yes
7531	TYROSINE 3-MONOOXYGENASE/TRYPTOPHAN 5-MONOOXYGENASE ACTIVATION PROTEIN, EPSILON POLYPEPTIDE	4285	0.153759	0.153082	Yes
10436	EMG1 NUCLEOLAR PROTEIN HOMOLOG (S. CEREVISIAE)	4290	0.153071	0.15373	Yes
7358	UDP-GLUCOSE DEHYDROGENASE	4291	0.153046	0.154668	Yes
8602	CHROMOSOME 4 OPEN READING FRAME 9	4296	0.152537	0.155316	Yes
5316	PBX/KNOTTED 1 HOMEOBOX 1	4309	0.151585	0.155384	Yes
57231	SORTING NEXIN 14	4312	0.151329	0.156177	Yes
6721	STEROL REGULATORY ELEMENT BINDING TRANSCRIPTION FACTOR 2	4313	0.151281	0.157115	Yes
8553	BASIC HELIX-LOOP-HELIX DOMAIN CONTAINING, CLASS B, 2	4326	0.150135	0.157183	Yes
2764	GLIA MATURATION FACTOR, BETA	4328	0.150022	0.158049	Yes
3609	INTERLEUKIN ENHANCER BINDING FACTOR 3, 90KDA	4344	0.14911	0.157899	Yes
51023	MITOCHONDRIAL RIBOSOMAL PROTEIN S18C	4347	0.148978	0.158692	Yes
6667	SP1 TRANSCRIPTION FACTOR	4349	0.148924	0.159558	Yes
65260	CHROMOSOME 1 OPEN READING FRAME 163	4356	0.148632	0.160061	Yes
1213	CLATHRIN, HEAVY POLYPEPTIDE (HC)	4378	0.147263	0.159476	Yes
79066	METHYLTRANSFERASE 10 DOMAIN CONTAINING	4379	0.147255	0.160414	Yes
5605	MITOGEN-ACTIVATED PROTEIN KINASE KINASE 2	4383	0.147093	0.161135	Yes
28976	ACYL-COENZYME A DEHYDROGENASE FAMILY, MEMBER 9	4392	0.146448	0.161493	Yes
79582	SPERM ASSOCIATED ANTIGEN 16	4403	0.14586	0.161706	Yes
11331	PROHIBITIN 2	4408	0.145514	0.162354	Yes
7469	WOLF-HIRSCHHORN SYNDROME CANDIDATE 2	4410	0.145486	0.163219	Yes
30827	CXXC FINGER 1 (PHD DOMAIN)	4418	0.14493	0.16365	Yes
79682	MLF1 INTERACTING PROTEIN	4420	0.144855	0.164515	Yes
1632	DODECENOYL-COENZYME A DELTA ISOMERASE (3,2 TRANS-ENOYL-COENZYME A ISOMERASE)	4423	0.144759	0.165308	Yes
54545	MYOTUBULARIN RELATED PROTEIN 12	4451	0.142732	0.164289	Yes
94239	H2A HISTONE FAMILY, MEMBER V	4458	0.142439	0.164792	Yes
2517	FUCOSIDASE, ALPHA-L- 1, TISSUE	4460	0.142227	0.165657	Yes
120379	HYPOTHETICAL PROTEIN BC019238	4474	0.141392	0.165653	Yes
29920	PYRROLINE-5-CARBOXYLATE REDUCTASE FAMILY, MEMBER 2	4478	0.141174	0.166373	Yes
345757	HGS_RE408	4485	0.140468	0.166876	Yes
57147	SCY1-LIKE 3 (S. CEREVISIAE)	4493	0.139919	0.167307	Yes
10111	RAD50 HOMOLOG (S. CEREVISIAE)	4516	0.138558	0.16665	Yes
1874	E2F TRANSCRIPTION FACTOR 4, P107/P130-BINDING	4521	0.137859	0.167298	Yes
163590	TORSIN A INTERACTING PROTEIN 2	4525	0.137491	0.168018	Yes
79735	TBC1 DOMAIN FAMILY, MEMBER 17	4526	0.137404	0.168956	Yes
55702	HYPOTHETICAL PROTEIN FLJ10374	4530	0.13721	0.169677	Yes
25962	KIAA1429	4556	0.134276	0.168802	Yes
5930	RETINOBLASTOMA BINDING PROTEIN 6	4562	0.13356	0.169378	Yes
51491	HYPOTHETICAL PROTEIN HSPC111	4564	0.13348	0.170243	Yes
55958	KELCH-LIKE 9 (DROSOPHILA)	4575	0.132776	0.170456	Yes
113178	SECRETORY CARRIER MEMBRANE PROTEIN 4	4589	0.131713	0.170452	Yes
79230	ZINC FINGER PROTEIN 557	4598	0.131341	0.17081	Yes
92305	TRANSMEMBRANE PROTEIN 129	4603	0.130964	0.171458	Yes
89891	WD REPEAT DOMAIN 34	4604	0.13094	0.172396	Yes
143187	VESICLE TRANSPORT THROUGH INTERACTION WITH T-SNARES HOMOLOG 1A (YEAST)	4617	0.129821	0.172464	Yes
2521	FUSION (INVOLVED IN T(12;16) IN MALIGNANT LIPOSARCOMA)	4628	0.129031	0.172677	Yes
55609	SUPPRESSOR OF HAIRY WING HOMOLOG 3 (DROSOPHILA)	4637	0.12796	0.173035	Yes
6772	SIGNAL TRANSDUCER AND ACTIVATOR OF TRANSCRIPTION 1, 91KDA	4649	0.126951	0.173175	Yes
84164	HYPOTHETICAL PROTEIN DKFZP586O0223	4651	0.126668	0.174041	Yes
84223	HYPOTHETICAL PROTEIN FLJ23571	4656	0.126522	0.174689	Yes
55904	HYPOTHETICAL PROTEIN FLJ10078	4664	0.12619	0.175119	Yes
58490	CHROMOSOME 20 OPEN READING FRAME 77	4666	0.126003	0.175985	Yes
79018	CHROMOSOME 17 OPEN READING FRAME 39	4673	0.125355	0.176488	Yes
3421	ISOCITRATE DEHYDROGENASE 3 (NAD+) GAMMA	4674	0.125339	0.177426	Yes
746	CHROMOSOME 11 OPEN READING FRAME 10	4682	0.124561	0.177857	Yes
5250	SOLUTE CARRIER FAMILY 25 (MITOCHONDRIAL CARRIER; PHOSPHATE CARRIER), MEMBER 3	4722	0.121767	0.175967	Yes
81602	CYTIDINE AND DCMP DEAMINASE DOMAIN CONTAINING 1	4746	0.120357	0.175237	Yes
6651	SON DNA BINDING PROTEIN	4765	0.118971	0.17487	Yes
60528	HYPOTHETICAL PROTEIN FLJ10530	4783	0.118281	0.174575	Yes
10061	ATP-BINDING CASSETTE, SUB-FAMILY F (GCN20), MEMBER 2	4794	0.116874	0.174788	Yes
5886	RAD23 HOMOLOG A (S. CEREVISIAE)	4800	0.116507	0.175364	Yes
27309	ZINC FINGER PROTEIN 330	4805	0.116405	0.176012	Yes
92935	METHIONINE-TRNA SYNTHETASE 2 (MITOCHONDRIAL)	4808	0.116313	0.176805	Yes
9917	FAMILY WITH SEQUENCE SIMILARITY 20, MEMBER B	4813	0.116082	0.177453	Yes
115560	ZINC FINGER PROTEIN 501	4848	0.113336	0.175926	Yes
6155	RIBOSOMAL PROTEIN L27	4871	0.111475	0.175269	Yes
54708	MEMBRANE-ASSOCIATED RING FINGER (C3HC4) 5	4873	0.111338	0.176134	Yes
2628	GLYCINE AMIDINOTRANSFERASE (L-ARGININE:GLYCINE AMIDINOTRANSFERASE)	4879	0.110911	0.17671	Yes
10522	DEFORMED EPIDERMAL AUTOREGULATORY FACTOR 1 (DROSOPHILA)	4908	0.109777	0.175617	Yes
1787	DNA (CYTOSINE-5-)-METHYLTRANSFERASE 2	4909	0.109749	0.176556	Yes
10952	SEC61 BETA SUBUNIT	4955	0.10715	0.174231	Yes
7415	VALOSIN-CONTAINING PROTEIN	4957	0.107032	0.175096	Yes
5714	PROTEASOME (PROSOME, MACROPAIN) 26S SUBUNIT, NON-ATPASE, 8	4967	0.106163	0.175382	Yes
4931	NUCLEAR VCP-LIKE	4971	0.105994	0.176102	Yes
2108	ELECTRON-TRANSFER-FLAVOPROTEIN, ALPHA POLYPEPTIDE (GLUTARIC ACIDURIA II)	4987	0.10467	0.175953	Yes
55500	ETHANOLAMINE KINASE 1	4990	0.104522	0.176746	Yes
84668	DOWN-REGULATED BY CTNNB1, A	5003	0.10365	0.176814	Yes
5641	LEGUMAIN	5041	0.101607	0.175069	Yes
23195	MDN1, MIDASIN HOMOLOG (YEAST)	5047	0.101368	0.175644	Yes
1432	MITOGEN-ACTIVATED PROTEIN KINASE 14	5049	0.101337	0.17651	Yes
143684	FAMILY WITH SEQUENCE SIMILARITY 76, MEMBER B	5066	0.100377	0.176288	Yes
5428	POLYMERASE (DNA DIRECTED), GAMMA	5076	0.0996447	0.176573	Yes
10589	DR1-ASSOCIATED PROTEIN 1 (NEGATIVE COFACTOR 2 ALPHA)	5089	0.0991864	0.176641	Yes
9870	KIAA0317	5094	0.0985749	0.177289	Yes
54878	DIPEPTIDYL-PEPTIDASE 8	5109	0.0970917	0.177212	Yes
8031	NUCLEAR RECEPTOR COACTIVATOR 4	5120	0.0965681	0.177425	Yes
50487	PHOSPHOLIPASE A2, GROUP III	5137	0.0953596	0.177203	Yes
7773	ZINC FINGER PROTEIN 230	5141	0.0950251	0.177924	Yes
8352	HISTONE 1, H3A	5154	0.0944712	0.177992	Yes
11171	SERINE/THREONINE KINASE RECEPTOR ASSOCIATED PROTEIN	5167	0.0935669	0.17806	Yes
9014	TATA BOX BINDING PROTEIN (TBP)-ASSOCIATED FACTOR, RNA POLYMERASE I, B, 63KDA	5176	0.0932765	0.178418	Yes
375035	SFT2 DOMAIN CONTAINING 2	5180	0.0931702	0.179138	Yes
84231	TNF RECEPTOR-ASSOCIATED FACTOR 7	5190	0.0925756	0.179424	Yes
8892	EUKARYOTIC TRANSLATION INITIATION FACTOR 2B, SUBUNIT 2 BETA, 39KDA	5198	0.0923281	0.179854	Yes
10898	CLEAVAGE AND POLYADENYLATION SPECIFIC FACTOR 4, 30KDA	5200	0.0921597	0.18072	Yes
2528	FUCOSYLTRANSFERASE 6 (ALPHA (1,3) FUCOSYLTRANSFERASE)	5205	0.0918026	0.181368	Yes
7556	ZINC FINGER PROTEIN 10	5224	0.0906067	0.181001	Yes
51259	HSPC244	5226	0.0904794	0.181866	Yes
9236	CELL CYCLE PROGRESSION 1	5254	0.088552	0.180847	No
55644	O-SIALOGLYCOPROTEIN ENDOPEPTIDASE	5267	0.0879538	0.180914	No
10521	DEAD (ASP-GLU-ALA-ASP) BOX POLYPEPTIDE 17	5296	0.0859501	0.179822	No
80208	KIAA1840	5377	0.0813384	0.174959	No
8838	WNT1 INDUCIBLE SIGNALING PATHWAY PROTEIN 3	5387	0.0802572	0.175245	No
55831	TRANSMEMBRANE PROTEIN 111	5398	0.0797892	0.175458	No
10694	CHAPERONIN CONTAINING TCP1, SUBUNIT 8 (THETA)	5400	0.0796795	0.176323	No
51118	UTP11-LIKE, U3 SMALL NUCLEOLAR RIBONUCLEOPROTEIN, (YEAST)	5412	0.0787969	0.176464	No
8899	PRP4 PRE-MRNA PROCESSING FACTOR 4 HOMOLOG B (YEAST)	5431	0.0775089	0.176097	No
3430	INTERFERON-INDUCED PROTEIN 35	5439	0.077225	0.176527	No
4719	NADH DEHYDROGENASE (UBIQUINONE) FE-S PROTEIN 1, 75KDA (NADH-COENZYME Q REDUCTASE)	5473	0.0748334	0.175073	No
161829	EXONUCLEASE 3'-5' DOMAIN-LIKE 1	5474	0.0748332	0.176011	No
84681	HISTIDINE TRIAD NUCLEOTIDE BINDING PROTEIN 2	5481	0.0744414	0.176514	No
2931	GLYCOGEN SYNTHASE KINASE 3 ALPHA	5483	0.0742075	0.177379	No
9235	INTERLEUKIN 32	5502	0.0732155	0.177012	No
26993	A KINASE (PRKA) ANCHOR PROTEIN 8-LIKE	5512	0.0725667	0.177298	No
80110	ZINC FINGER PROTEIN 614	5548	0.0708044	0.175698	No
10606	PHOSPHORIBOSYLAMINOIMIDAZOLE CARBOXYLASE, PHOSPHORIBOSYLAMINOIMIDAZOLE SUCCINOCARBOXAMIDE SYNTHETASE	5597	0.0678234	0.173155	No
124454	KIAA1970 PROTEIN	5609	0.067261	0.173296	No
9984	THO COMPLEX 1	5625	0.0664029	0.173146	No
11316	COATOMER PROTEIN COMPLEX, SUBUNIT EPSILON	5634	0.0659108	0.173504	No
6102	RETINITIS PIGMENTOSA 2 (X-LINKED RECESSIVE)	5635	0.0657538	0.174442	No
91272	FAMILY WITH SEQUENCE SIMILARITY 44, MEMBER B	5652	0.0649023	0.17422	No
26515	FRACTURE CALLUS 1 HOMOLOG (RAT)	5662	0.0643902	0.174506	No
162239	ZINC FINGER PROTEIN 1 HOMOLOG (MOUSE)	5681	0.0633335	0.174139	No
60672	INVASION INHIBITORY PROTEIN 45	5733	0.0606732	0.171379	No
513	ATP SYNTHASE, H+ TRANSPORTING, MITOCHONDRIAL F1 COMPLEX, DELTA SUBUNIT	5740	0.0602553	0.171882	No
55298	RING FINGER PROTEIN 121	5759	0.0589626	0.171515	No
5588	PROTEIN KINASE C, THETA	5781	0.0578763	0.17093	No
4723	NADH DEHYDROGENASE (UBIQUINONE) FLAVOPROTEIN 1, 51KDA	5782	0.0578465	0.171868	No
65083	NUCLEOLAR PROTEIN FAMILY 6 (RNA-ASSOCIATED)	5788	0.0576181	0.172444	No
26995	TRUB PSEUDOURIDINE (PSI) SYNTHASE HOMOLOG 2 (E. COLI)	5838	0.055397	0.169829	No
10452	TRANSLOCASE OF OUTER MITOCHONDRIAL MEMBRANE 40 HOMOLOG (YEAST)	5851	0.0543962	0.169897	No
84217	ZINC FINGER, MYND-TYPE CONTAINING 12	5856	0.0541375	0.170545	No
2768	GUANINE NUCLEOTIDE BINDING PROTEIN (G PROTEIN) ALPHA 12	5858	0.054122	0.17141	No
6203	RIBOSOMAL PROTEIN S9	5860	0.0539331	0.172276	No
51535	HYPOTHETICAL PROTEIN HSPC206	5897	0.0520005	0.170603	No
10256	CONNECTOR ENHANCER OF KINASE SUPPRESSOR OF RAS 1	5903	0.0514381	0.171179	No
2733	GLE1 RNA EXPORT MEDIATOR-LIKE (YEAST)	5907	0.0512164	0.1719	No
11261	CALCIUM BINDING PROTEIN P22	5920	0.050838	0.171967	No
2595	GLUCOSIDASE, ALPHA; NEUTRAL C	5925	0.0507212	0.172616	No
169270	ZINC FINGER PROTEIN 596	5937	0.050063	0.172756	No
55665	UP-REGULATED GENE 4	5946	0.049407	0.173114	No
10575	CHAPERONIN CONTAINING TCP1, SUBUNIT 4 (DELTA)	5959	0.0488954	0.173182	No
432	ASIALOGLYCOPROTEIN RECEPTOR 1	5967	0.0485797	0.173612	No
54985	HOST CELL FACTOR C1 REGULATOR 1 (XPO1 DEPENDENT)	5977	0.0480833	0.173898	No
25796	6-PHOSPHOGLUCONOLACTONASE	5980	0.0479288	0.174691	No
283687	CHROMOSOME 15 OPEN READING FRAME 37	5986	0.0473568	0.175266	No
374395	SIMILAR TO RIKEN CDNA 1810059G22	6002	0.0465026	0.175117	No
51293	CD320 ANTIGEN	6019	0.0453396	0.174895	No
126375	FLJ38451 PROTEIN	6052	0.0435208	0.173513	No
7314	UBIQUITIN B	6053	0.0434771	0.174451	No
285429	HYPOTHETICAL PROTEIN LOC285429	6074	0.0419135	0.173939	No
124045	CHROMOSOME 16 OPEN READING FRAME 55	6081	0.041579	0.174442	No
60386	SOLUTE CARRIER FAMILY 25 (MITOCHONDRIAL DEOXYNUCLEOTIDE CARRIER), MEMBER 19	6108	0.0404696	0.173494	No
2155	COAGULATION FACTOR VII (SERUM PROTHROMBIN CONVERSION ACCELERATOR)	6124	0.0395617	0.173345	No
27085	MDM2, TRANSFORMED 3T3 CELL DOUBLE MINUTE 2, P53 BINDING PROTEIN (MOUSE) BINDING PROTEIN, 104KDA	6142	0.0388473	0.17305	No
5830	PEROXISOMAL BIOGENESIS FACTOR 5	6145	0.0387905	0.173843	No
64428	NUCLEAR PRELAMIN A RECOGNITION FACTOR-LIKE	6165	0.0379536	0.173404	No
10428	CRANIOFACIAL DEVELOPMENT PROTEIN 1	6212	0.0353575	0.171006	No
54623	PAF1, RNA POLYMERASE II ASSOCIATED FACTOR, HOMOLOG (S. CEREVISIAE)	6236	0.0342777	0.170277	No
259	ALPHA-1-MICROGLOBULIN/BIKUNIN PRECURSOR	6239	0.0341053	0.17107	No
5437	POLYMERASE (RNA) II (DNA DIRECTED) POLYPEPTIDE H	6255	0.0335751	0.17092	No
51117	COENZYME Q4 HOMOLOG (YEAST)	6264	0.0329375	0.171278	No
159686	CHROMOSOME 10 OPEN READING FRAME 80	6281	0.0321898	0.171056	No
200894	ADP-RIBOSYLATION FACTOR-LIKE 13B	6299	0.0310185	0.170761	No
440072	CHROMOSOME 11 OPEN READING FRAME 37	6301	0.0309494	0.171627	No
6722	SERUM RESPONSE FACTOR (C-FOS SERUM RESPONSE ELEMENT-BINDING TRANSCRIPTION FACTOR)	6319	0.0301991	0.171332	No
54814	GLUTAMINYL-PEPTIDE CYCLOTRANSFERASE-LIKE	6333	0.0295193	0.171328	No
55621	TRM1 TRNA METHYLTRANSFERASE 1 HOMOLOG (S. CEREVISIAE)	6344	0.0288377	0.171541	No
6152	RIBOSOMAL PROTEIN L24	6357	0.0282836	0.171609	No
257169	CHROMOSOME 9 OPEN READING FRAME 43	6362	0.0281551	0.172257	No
283431	GROWTH ARREST-SPECIFIC 2 LIKE 3	6365	0.027796	0.17305	No
9310	ZINC FINGER PROTEIN 235	6427	0.0238965	0.169565	No
23647	ADP-RIBOSYLATION FACTOR INTERACTING PROTEIN 2 (ARFAPTIN 2)	6446	0.0232282	0.169198	No
63929	HYPOTHETICAL PROTEIN LOC63929	6457	0.0225005	0.169411	No
2580	CYCLIN G ASSOCIATED KINASE	6463	0.0220079	0.169986	No
9156	EXONUCLEASE 1	6470	0.0211613	0.170489	No
91647	ATP SYNTHASE MITOCHONDRIAL F1 COMPLEX ASSEMBLY FACTOR 2	6473	0.0210361	0.171282	No
3895	KINECTIN 1 (KINESIN RECEPTOR)	6495	0.0194907	0.170698	No
995	CELL DIVISION CYCLE 25C	6505	0.0190129	0.170983	No
29880	ASPARAGINE-LINKED GLYCOSYLATION 5 HOMOLOG (YEAST, DOLICHYL-PHOSPHATE BETA-GLUCOSYLTRANSFERASE)	6512	0.0187435	0.171486	No
51164	DYNACTIN 4 (P62)	6518	0.0184951	0.172062	No
83638	BASOPHILIC LEUKEMIA EXPRESSED PROTEIN BLES03	6537	0.0179703	0.171694	No
81671	TRANSMEMBRANE PROTEIN 49	6543	0.0177274	0.17227	No
5269	SERPIN PEPTIDASE INHIBITOR, CLADE B (OVALBUMIN), MEMBER 6	6550	0.0174327	0.172773	No
8411	EARLY ENDOSOME ANTIGEN 1, 162KD	6553	0.0173761	0.173566	No
26517	TRANSLOCASE OF INNER MITOCHONDRIAL MEMBRANE 13 HOMOLOG (YEAST)	6575	0.016521	0.172981	No
26277	TERF1 (TRF1)-INTERACTING NUCLEAR FACTOR 2	6579	0.0164137	0.173702	No
93550	AN1, UBIQUITIN-LIKE, HOMOLOG (XENOPUS LAEVIS)	6582	0.0163205	0.174495	No
84865	HYPOTHETICAL PROTEIN FLJ14397	6587	0.0160935	0.175143	No
128869	CDC91 CELL DIVISION CYCLE 91-LIKE 1 (S. CEREVISIAE)	6627	0.0143161	0.173253	No
3949	LOW DENSITY LIPOPROTEIN RECEPTOR (FAMILIAL HYPERCHOLESTEROLEMIA)	6665	0.0126846	0.171508	No
989	SEPTIN 7	6671	0.0125475	0.172084	No
84134	TRANSLOCASE OF OUTER MITOCHONDRIAL MEMBRANE 40 HOMOLOG-LIKE (YEAST)	6682	0.0120707	0.172297	No
84769	HYPOTHETICAL PROTEIN MGC12972	6704	0.0110121	0.171712	No
148266	ZINC FINGER PROTEIN 569	6712	0.0106753	0.172143	No
80344	WD REPEAT DOMAIN 23	6715	0.0105195	0.172936	No
84067	CHROMOSOME 11 OPEN READING FRAME 56	6719	0.0104644	0.173656	No
11333	PDGFA ASSOCIATED PROTEIN 1	6732	0.00967669	0.173724	No
79157	HYPOTHETICAL PROTEIN ET	6757	0.00818038	0.172922	No
123811	CHROMOSOME 16 OPEN READING FRAME 63	6762	0.00797176	0.17357	No
10617	STAM BINDING PROTEIN	6768	0.00774384	0.174146	No
54984	PIN2-INTERACTING PROTEIN 1	6797	0.00587034	0.173053	No
148022	HYPOTHETICAL PROTEIN, CLONE 24751	6829	0.00459385	0.171744	No
399	RAS HOMOLOG GENE FAMILY, MEMBER H	6866	0.0030036	0.170071	No
11280	SODIUM CHANNEL, VOLTAGE-GATED, TYPE XII, ALPHA POLYPEPTIDE	6883	0.00230455	0.169849	No
718	COMPLEMENT COMPONENT 3	6888	0.00217199	0.170497	No
8542	APOLIPOPROTEIN L, 1	6979	-0.00182986	0.164909	No
54769	DIRAS FAMILY, GTP-BINDING RAS-LIKE 2	7062	-0.00621295	0.159902	No
29844	TCF3 (E2A) FUSION PARTNER (IN CHILDHOOD LEUKEMIA)	7068	-0.0064435	0.160477	No
51639	SPLICING FACTOR 3B, 14 KDA SUBUNIT	7074	-0.0066123	0.161053	No
9512	PEPTIDASE (MITOCHONDRIAL PROCESSING) BETA	7094	-0.0075078	0.160613	No
84330	ZINC FINGER PROTEIN 414	7110	-0.00817561	0.160464	No
1938	EUKARYOTIC TRANSLATION ELONGATION FACTOR 2	7150	-0.0100365	0.158574	No
9044	BTAF1 RNA POLYMERASE II, B-TFIID TRANSCRIPTION FACTOR-ASSOCIATED, 170KDA (MOT1 HOMOLOG, S. CEREVISIAE)	7175	-0.0112152	0.157771	No
6138	RIBOSOMAL PROTEIN L15	7188	-0.0121284	0.157839	No
11284	POLYNUCLEOTIDE KINASE 3'-PHOSPHATASE	7226	-0.0135028	0.156095	No
23646	PHOSPHOLIPASE D FAMILY, MEMBER 3	7268	-0.0155768	0.15406	No
7355	SOLUTE CARRIER FAMILY 35 (UDP-GALACTOSE TRANSPORTER), MEMBER A2	7294	-0.0171907	0.153185	No
27102	EUKARYOTIC TRANSLATION INITIATION FACTOR 2-ALPHA KINASE 1	7299	-0.0173869	0.153833	No
10524	HIV-1 TAT INTERACTING PROTEIN, 60KDA	7303	-0.0175817	0.154554	No
26190	F-BOX AND WD-40 DOMAIN PROTEIN 2	7304	-0.0175979	0.155492	No
4901	NEURAL RETINA LEUCINE ZIPPER	7335	-0.0192018	0.154254	No
65123	CHROMOSOME 1 OPEN READING FRAME 60	7336	-0.0193133	0.155193	No
84307	ZINC FINGER PROTEIN 397	7341	-0.0195947	0.155841	No
1736	DYSKERATOSIS CONGENITA 1, DYSKERIN	7346	-0.0197234	0.156489	No
27077	B9 PROTEIN	7367	-0.0207829	0.155977	No
84060	HYPOTHETICAL PROTEIN DKFZP564O0523	7385	-0.0214105	0.155682	No
4928	NUCLEOPORIN 98KDA	7387	-0.0215318	0.156547	No
6187	RIBOSOMAL PROTEIN S2	7394	-0.021771	0.157051	No
254158	HYPOTHETICAL PROTEIN FLJ25444	7422	-0.022859	0.156031	No
3155	3-HYDROXYMETHYL-3-METHYLGLUTARYL-COENZYME A LYASE (HYDROXYMETHYLGLUTARICACIDURIA)	7443	-0.0239873	0.155519	No
11165	DIPHOSPHOINOSITOL POLYPHOSPHATE PHOSPHOHYDROLASE	7468	-0.024919	0.154716	No
7818	DEATH ASSOCIATED PROTEIN 3	7481	-0.0254416	0.154784	No
9238	TRANSFORMING GROWTH FACTOR BETA REGULATOR 4	7485	-0.0257447	0.155505	No
23385	NICASTRIN	7487	-0.0257621	0.156371	No
64645	HIPPOCAMPUS ABUNDANT TRANSCRIPT 1	7493	-0.0260501	0.156946	No
1778	DYNEIN, CYTOPLASMIC 1, HEAVY CHAIN 1	7494	-0.0260677	0.157884	No
54464	5'-3' EXORIBONUCLEASE 1	7501	-0.0261555	0.158387	No
283135	HYPOTHETICAL PROTEIN LOC283135	7502	-0.0261858	0.159325	No
6125	RIBOSOMAL PROTEIN L5	7556	-0.0284314	0.15642	No
79831	JUMONJI DOMAIN CONTAINING 5	7561	-0.0285628	0.157068	No
23163	GOLGI ASSOCIATED, GAMMA ADAPTIN EAR CONTAINING, ARF BINDING PROTEIN 3	7597	-0.0310347	0.155469	No
2885	GROWTH FACTOR RECEPTOR-BOUND PROTEIN 2	7639	-0.0332608	0.153434	No
11340	EXOSOME COMPONENT 8	7652	-0.033886	0.153502	No
7768	ZINC FINGER PROTEIN 225	7655	-0.0340483	0.154295	No
5525	PROTEIN PHOSPHATASE 2, REGULATORY SUBUNIT B (B56), ALPHA ISOFORM	7660	-0.0342064	0.154943	No
3029	HYDROXYACYLGLUTATHIONE HYDROLASE	7667	-0.0345252	0.155446	No
55670	PEROXISOME BIOGENESIS FACTOR 26	7675	-0.0350337	0.155876	No
3073	HEXOSAMINIDASE A (ALPHA POLYPEPTIDE)	7699	-0.0360594	0.155147	No
328	APEX NUCLEASE (MULTIFUNCTIONAL DNA REPAIR ENZYME) 1	7705	-0.0363145	0.155722	No
6905	TUBULIN-SPECIFIC CHAPERONE E	7750	-0.0384445	0.15347	No
83872	HEMICENTIN 1	7770	-0.0393945	0.15303	No
23229	CDC42 GUANINE NUCLEOTIDE EXCHANGE FACTOR (GEF) 9	7781	-0.0397582	0.153243	No
29105	GENE TRAP LOCUS 3 (MOUSE)	7795	-0.0403905	0.153239	No
7093	TOLLOID-LIKE 2	7831	-0.0422846	0.151639	No
23399	DULLARD HOMOLOG (XENOPUS LAEVIS)	7845	-0.0429082	0.151634	No
4799	NUCLEAR TRANSCRIPTION FACTOR, X-BOX BINDING 1	7866	-0.0439661	0.151122	No
5478	PEPTIDYLPROLYL ISOMERASE A (CYCLOPHILIN A)	7869	-0.0441298	0.151915	No
1345	CYTOCHROME C OXIDASE SUBUNIT VIC	7873	-0.0443449	0.152636	No
285636	HYPOTHETICAL PROTEIN LOC285636	7886	-0.0449007	0.152704	No
10024	TROPHININ ASSOCIATED PROTEIN (TASTIN)	7907	-0.0458484	0.152191	No
4600	MYXOVIRUS (INFLUENZA VIRUS) RESISTANCE 2 (MOUSE)	7933	-0.0473268	0.151317	No
9255	SMALL INDUCIBLE CYTOKINE SUBFAMILY E, MEMBER 1 (ENDOTHELIAL MONOCYTE-ACTIVATING)	7960	-0.0483608	0.15037	No
124044	HYPOTHETICAL PROTEIN MGC26885	7995	-0.0502529	0.148842	No
55216	HYPOTHETICAL PROTEIN FLJ10726	8012	-0.0510356	0.14862	No
3615	IMP (INOSINE MONOPHOSPHATE) DEHYDROGENASE 2	8035	-0.0521121	0.147963	No
5261	PHOSPHORYLASE KINASE, GAMMA 2 (TESTIS)	8143	-0.0563216	0.141142	No
55231	HYPOTHETICAL PROTEIN FLJ10786	8155	-0.056632	0.141283	No
23210	PHOSPHATIDYLSERINE RECEPTOR	8171	-0.0572114	0.141133	No
23005	MITOGEN ACTIVATED PROTEIN KINASE BINDING PROTEIN 1	8179	-0.057363	0.141564	No
9605	CHROMOSOME 16 OPEN READING FRAME 7	8183	-0.0574915	0.142284	No
79228	THO COMPLEX 6 HOMOLOG (DROSOPHILA)	8213	-0.059082	0.14112	No
51669	TRANSMEMBRANE PROTEIN 66	8281	-0.0617256	0.137199	No
400566	HYPOTHETICAL GENE SUPPORTED BY AK128660	8296	-0.0623109	0.137122	No
51147	INHIBITOR OF GROWTH FAMILY, MEMBER 4	8303	-0.0627935	0.137625	No
9139	CORE-BINDING FACTOR, RUNT DOMAIN, ALPHA SUBUNIT 2; TRANSLOCATED TO, 2	8311	-0.0631659	0.138056	No
51142	COILED-COIL-HELIX-COILED-COIL-HELIX DOMAIN CONTAINING 2	8360	-0.0656662	0.135514	No
10989	INNER MEMBRANE PROTEIN, MITOCHONDRIAL (MITOFILIN)	8376	-0.0665498	0.135364	No
29942	PURINE-RICH ELEMENT BINDING PROTEIN G	8419	-0.0685601	0.133257	No
140699	CHROMOSOME 20 OPEN READING FRAME 132	8459	-0.0702343	0.131367	No
79728	HYPOTHETICAL PROTEIN FLJ21816	8462	-0.0703354	0.13216	No
64799	IQ MOTIF CONTAINING H	8488	-0.0714058	0.131285	No
79949	CHROMOSOME 10 OPEN READING FRAME 81	8583	-0.0749693	0.125407	No
6560	SOLUTE CARRIER FAMILY 12 (POTASSIUM/CHLORIDE TRANSPORTERS), MEMBER 4	8587	-0.0752332	0.126128	No
285962	HYPOTHETICAL PROTEIN FLJ40852	8600	-0.075799	0.126196	No
10960	LECTIN, MANNOSE-BINDING 2	8631	-0.0768661	0.124958	No
5859	GLUTAMINYL-TRNA SYNTHETASE	8634	-0.0768785	0.125751	No
83852	SET DOMAIN, BIFURCATED 2	8641	-0.0774024	0.126254	No
27042	CHROMOSOME 1 OPEN READING FRAME 107	8696	-0.0803668	0.123277	No
57335	ZINC FINGER PROTEIN 286	8726	-0.0815279	0.122112	No
51191	HECT DOMAIN AND RLD 5	8734	-0.0818791	0.122543	No
140459	LIKELY ORTHOLOG OF MOUSE ANKYRIN REPEAT AND SOCS BOX-CONTAINING PROTEIN 6	8789	-0.084533	0.119565	No
130733	HYPOTHETICAL PROTEIN MGC33926	8797	-0.0848945	0.119996	No
51004	COENZYME Q6 HOMOLOG, MONOOXYGENASE (YEAST)	8803	-0.0850451	0.120571	No
55613	MYOTUBULARIN RELATED PROTEIN 8	8805	-0.0850747	0.121437	No
7507	XERODERMA PIGMENTOSUM, COMPLEMENTATION GROUP A	8817	-0.0855186	0.121577	No
257062	HYPOTHETICAL PROTEIN MGC39581	8844	-0.0870728	0.12063	No
65996	HYPOTHETICAL PROTEIN MGC2752	8871	-0.0880044	0.119683	No
56270	WDR45-LIKE	8885	-0.0885696	0.119678	No
51292	GUANOSINE MONOPHOSPHATE REDUCTASE 2	8914	-0.0901346	0.118586	No
51684	SUPPRESSOR OF FUSED HOMOLOG (DROSOPHILA)	8939	-0.0912395	0.117784	No
199745	THAP DOMAIN CONTAINING 8	8983	-0.0936797	0.115604	No
7018	TRANSFERRIN	9022	-0.0953226	0.113787	No
154881	POTASSIUM CHANNEL TETRAMERISATION DOMAIN CONTAINING 7	9030	-0.0958087	0.114217	No
253430	INOSITOL POLYPHOSPHATE MULTIKINASE	9045	-0.0966123	0.11414	No
283635	CHROMOSOME 14 OPEN READING FRAME 24	9060	-0.0972085	0.114063	No
9572	NUCLEAR RECEPTOR SUBFAMILY 1, GROUP D, MEMBER 1	9062	-0.0973406	0.114929	No
4247	MANNOSYL (ALPHA-1,6-)-GLYCOPROTEIN BETA-1,2-N-ACETYLGLUCOSAMINYLTRANSFERASE	9065	-0.0974851	0.115722	No
51399	TRAFFICKING PROTEIN PARTICLE COMPLEX 4	9088	-0.0985065	0.115065	No
123775	CHROMOSOME 16 OPEN READING FRAME 46	9090	-0.098526	0.11593	No
5989	REGULATORY FACTOR X, 1 (INFLUENCES HLA CLASS II EXPRESSION)	9094	-0.0986395	0.116651	No
55757	UDP-GLUCOSE CERAMIDE GLUCOSYLTRANSFERASE-LIKE 2	9100	-0.0988138	0.117226	No
2618	PHOSPHORIBOSYLGLYCINAMIDE FORMYLTRANSFERASE, PHOSPHORIBOSYLGLYCINAMIDE SYNTHETASE, PHOSPHORIBOSYLAMINOIMIDAZOLE SYNTHETASE	9102	-0.0989203	0.118092	No
26610	ELONGATION PROTEIN 4 HOMOLOG (S. CEREVISIAE)	9105	-0.0990434	0.118885	No
10456	HCLS1 ASSOCIATED PROTEIN X-1	9117	-0.0993481	0.119025	No
2181	ACYL-COA SYNTHETASE LONG-CHAIN FAMILY MEMBER 3	9118	-0.0994	0.119963	No
55269	PARASPECKLE COMPONENT 1	9120	-0.0994759	0.120829	No
55282	LEUCINE RICH REPEAT CONTAINING 36	9124	-0.0996978	0.12155	No
5207	6-PHOSPHOFRUCTO-2-KINASE/FRUCTOSE-2,6-BIPHOSPHATASE 1	9129	-0.0999072	0.122198	No
55527	FEM-1 HOMOLOG A (C.ELEGANS)	9149	-0.100937	0.121758	No
90121	HYPOTHETICAL PROTEIN DT1P1A10	9193	-0.10308	0.119578	No
80209	CHROMOSOME 13 OPEN READING FRAME 23	9204	-0.103662	0.119791	No
55741	CHROMOSOME 20 OPEN READING FRAME 31	9234	-0.104892	0.118626	No
55032	SOLUTE CARRIER FAMILY 35, MEMBER A5	9244	-0.105296	0.118912	No
201514	ZINC FINGER PROTEIN 584	9253	-0.10556	0.11927	No
80071	COILED-COIL DOMAIN CONTAINING 15	9267	-0.106251	0.119265	No
64422	ATG3 AUTOPHAGY RELATED 3 HOMOLOG (S. CEREVISIAE)	9290	-0.107361	0.118608	No
81789	TIGGER TRANSPOSABLE ELEMENT DERIVED 6	9295	-0.1075	0.119256	No
3187	HETEROGENEOUS NUCLEAR RIBONUCLEOPROTEIN H1 (H)	9299	-0.107763	0.119977	No
50	ACONITASE 2, MITOCHONDRIAL	9316	-0.108659	0.119755	No
51161	CHROMOSOME 3 OPEN READING FRAME 18	9370	-0.111577	0.11685	No
9550	ATPASE, H+ TRANSPORTING, LYSOSOMAL 13KDA, V1 SUBUNIT G1	9378	-0.111984	0.11728	No
7037	TRANSFERRIN RECEPTOR (P90, CD71)	9384	-0.1122	0.117856	No
2868	G PROTEIN-COUPLED RECEPTOR KINASE 4	9409	-0.113379	0.117053	No
148268	ZINC FINGER PROTEIN 570	9415	-0.113617	0.117629	No
10025	THYROID HORMONE RECEPTOR ASSOCIATED PROTEIN 5	9449	-0.115069	0.116174	No
79090	TRAFFICKING PROTEIN PARTICLE COMPLEX 6A	9470	-0.115943	0.115662	No
7157	TUMOR PROTEIN P53 (LI-FRAUMENI SYNDROME)	9478	-0.116271	0.116093	No
200576	LIKELY ORTHOLOG OF MOUSE PHOSPHATIDYLINOSITOL-4-PHOSPHATE 5-KINASE, TYPE III	9499	-0.116927	0.11558	No
221785	ZINC FINGER PROTEIN 498	9560	-0.11997	0.112168	No
5981	REPLICATION FACTOR C (ACTIVATOR 1) 1, 145KDA	9570	-0.120517	0.112453	No
54806	ABELSON HELPER INTEGRATION SITE 1	9587	-0.121579	0.112231	No
1399	V-CRK SARCOMA VIRUS CT10 ONCOGENE HOMOLOG (AVIAN)-LIKE	9591	-0.121837	0.112952	No
56980	PR DOMAIN CONTAINING 10	9597	-0.122219	0.113527	No
6670	SP3 TRANSCRIPTION FACTOR	9609	-0.122901	0.113668	No
56159	TESTIS EXPRESSED SEQUENCE 11	9634	-0.124639	0.112866	No
161835	FIBROUS SHEATH INTERACTING PROTEIN 1	9637	-0.124722	0.113659	No
7186	TNF RECEPTOR-ASSOCIATED FACTOR 2	9639	-0.124877	0.114524	No
55090	MEDIATOR OF RNA POLYMERASE II TRANSCRIPTION, SUBUNIT 9 HOMOLOG (YEAST)	9662	-0.126139	0.113867	No
9923	ZINC FINGER AND BTB DOMAIN CONTAINING 40	9668	-0.126435	0.114443	No
23081	JUMONJI DOMAIN CONTAINING 2C	9689	-0.127654	0.113931	No
1268	CANNABINOID RECEPTOR 1 (BRAIN)	9742	-0.130281	0.111098	No
80157	HYPOTHETICAL PROTEIN FLJ21511	9779	-0.132837	0.109426	No
284996	RING FINGER PROTEIN 149	9785	-0.133208	0.110001	No
63925	ZINC FINGER PROTEIN 335	9809	-0.134728	0.109272	No
7320	UBIQUITIN-CONJUGATING ENZYME E2B (RAD6 HOMOLOG)	9814	-0.134933	0.10992	No
51651	PEPTIDYL-TRNA HYDROLASE 2	9842	-0.136037	0.1089	No
91	ACTIVIN A RECEPTOR, TYPE IB	9911	-0.13997	0.104907	No
51386	EUKARYOTIC TRANSLATION INITIATION FACTOR 3, SUBUNIT 6 INTERACTING PROTEIN	9914	-0.140011	0.1057	No
23386	NUDC DOMAIN CONTAINING 3	9940	-0.141438	0.104826	No
148362	CHROMOSOME 1 OPEN READING FRAME 58	9956	-0.142324	0.104676	No
84167	HYPOTHETICAL PROTEIN FLJ21742	10062	-0.147468	0.0980005	No
55035	NUCLEOLAR PROTEIN 8	10064	-0.147583	0.098866	No
54556	INHIBITOR OF GROWTH FAMILY, MEMBER 3	10072	-0.147913	0.0992965	No
7316	UBIQUITIN C	10100	-0.149564	0.0982768	No
79877	DEPHOSPHO-COA KINASE DOMAIN CONTAINING	10109	-0.149913	0.0986348	No
113510	DNA HELICASE HEL308	10124	-0.150673	0.0985578	No
84243	ZINC FINGER, DHHC-TYPE CONTAINING 18	10134	-0.15116	0.0988432	No
6748	SIGNAL SEQUENCE RECEPTOR, DELTA (TRANSLOCON-ASSOCIATED PROTEIN DELTA)	10170	-0.153296	0.0972434	No
6273	S100 CALCIUM BINDING PROTEIN A2	10173	-0.153434	0.0980365	No
3717	JANUS KINASE 2 (A PROTEIN TYROSINE KINASE)	10200	-0.154611	0.0970893	No
5471	PHOSPHORIBOSYL PYROPHOSPHATE AMIDOTRANSFERASE	10240	-0.156239	0.0951995	No
9804	TRANSLOCASE OF OUTER MITOCHONDRIAL MEMBRANE 20 HOMOLOG (YEAST)	10256	-0.157342	0.0950499	No
10163	WAS PROTEIN FAMILY, MEMBER 2	10280	-0.15865	0.0943202	No
23093	TUBULIN TYROSINE LIGASE-LIKE FAMILY, MEMBER 5	10299	-0.159397	0.0939531	No
10656	KH DOMAIN CONTAINING, RNA BINDING, SIGNAL TRANSDUCTION ASSOCIATED 3	10300	-0.159442	0.0948912	No
81617	CALCIUM BINDING PROTEIN 39-LIKE	10301	-0.159487	0.0958293	No
9150	CTD (CARBOXY-TERMINAL DOMAIN, RNA POLYMERASE II, POLYPEPTIDE A) PHOSPHATASE, SUBUNIT 1	10314	-0.160313	0.0958972	No
84925	DISRUPTED IN RENAL CARCINOMA 2	10364	-0.164336	0.0932823	No
56681	SAR1 GENE HOMOLOG A (S. CEREVISIAE)	10372	-0.16467	0.0937128	No
83450	LEUCINE RICH REPEAT CONTAINING 48	10374	-0.16488	0.0945784	No
284403	CHROMOSOME 19 OPEN READING FRAME 14	10451	-0.168637	0.0900056	No
285782	CANCER ANTIGEN 1	10487	-0.170721	0.0884058	No
6911	T-BOX 6	10568	-0.175197	0.083543	No
1650	DOLICHYL-DIPHOSPHOOLIGOSACCHARIDE-PROTEIN GLYCOSYLTRANSFERASE	10578	-0.175661	0.0838285	No
94103	HYPOTHETICAL PROTEIN LOC51242	10602	-0.176822	0.0830988	No
84955	NUDC DOMAIN CONTAINING 1	10606	-0.177049	0.0838194	No
79016	DDA1	10612	-0.177523	0.0843949	No
25983	CHROMOSOME 14 OPEN READING FRAME 120	10624	-0.178244	0.0845354	No
92399	MITOCHONDRIAL RIBOSOME RECYCLING FACTOR	10635	-0.178804	0.0847484	No
58477	SIGNAL RECOGNITION PARTICLE RECEPTOR, B SUBUNIT	10648	-0.179936	0.0848163	No
4034	LEUCINE-RICH REPEATS AND CALPONIN HOMOLOGY (CH) DOMAIN CONTAINING 4	10678	-0.181506	0.0836516	No
338692	ANKYRIN REPEAT DOMAIN 13 FAMILY, MEMBER D	10686	-0.182128	0.0840821	No
132321	HYPOTHETICAL PROTEIN LOC132321	10736	-0.184934	0.0814671	No
51742	AT RICH INTERACTIVE DOMAIN 4B (RBP1- LIKE)	10771	-0.187621	0.0799398	No
6185	RIBOPHORIN II	10796	-0.189022	0.0791377	No
22849	CYTOPLASMIC POLYADENYLATION ELEMENT BINDING PROTEIN 3	10814	-0.190119	0.078843	No
26260	F-BOX PROTEIN 25	10815	-0.190214	0.0797811	No
90411	MULTIPLE COAGULATION FACTOR DEFICIENCY 2	10839	-0.192057	0.0790515	No
10289	EUKARYOTIC TRANSLATION INITIATION FACTOR 1B	10864	-0.193587	0.0782493	No
56931	DIHYDROURIDINE SYNTHASE 3-LIKE (S. CEREVISIAE)	10903	-0.196125	0.0764319	No
126133	ALDEHYDE DEHYDROGENASE 16 FAMILY, MEMBER A1	10935	-0.19794	0.0751222	No
261734	KIAA0673 PROTEIN	10945	-0.198377	0.0754077	No
347344	ZINC FINGER PROTEIN 81 (HFZ20)	10974	-0.200006	0.0743155	No
80832	APOLIPOPROTEIN L, 4	10984	-0.200824	0.0746009	No
81614	NON IMPRINTED IN PRADER-WILLI/ANGELMAN SYNDROME 2	11015	-0.202667	0.0733637	No
2957	GENERAL TRANSCRIPTION FACTOR IIA, 1, 19/37KDA	11045	-0.204224	0.072199	No
6872	TAF1 RNA POLYMERASE II, TATA BOX BINDING PROTEIN (TBP)-ASSOCIATED FACTOR, 250KDA	11092	-0.207284	0.0698016	No
8731	RNA (GUANINE-7-) METHYLTRANSFERASE	11180	-0.212767	0.0644312	No
54882	ANKYRIN REPEAT AND KH DOMAIN CONTAINING 1	11207	-0.214131	0.063484	No
38	ACETYL-COENZYME A ACETYLTRANSFERASE 1 (ACETOACETYL COENZYME A THIOLASE)	11226	-0.215497	0.0631169	No
3376	ISOLEUCINE-TRNA SYNTHETASE	11246	-0.217276	0.0626772	No
83937	RAS ASSOCIATION (RALGDS/AF-6) DOMAIN FAMILY 4	11254	-0.217616	0.0631077	No
118980	SIDEROFLEXIN 2	11257	-0.21778	0.0639008	No
29979	UBIQUILIN 1	11261	-0.217932	0.0646214	No
6294	SCAFFOLD ATTACHMENT FACTOR B	11292	-0.220766	0.0633841	No
80279	CDK5 REGULATORY SUBUNIT ASSOCIATED PROTEIN 3	11306	-0.221672	0.0633796	No
84286	HYPOTHETICAL PROTEIN MGC4618	11352	-0.22467	0.0610546	No
29919	CHROMOSOME 18 OPEN READING FRAME 8	11362	-0.225637	0.0613401	No
11127	KINESIN FAMILY MEMBER 3A	11379	-0.226963	0.061118	No
382	ADP-RIBOSYLATION FACTOR 6	11399	-0.228374	0.0606784	No
85465	SELENOPROTEIN I	11407	-0.228954	0.0611089	No
5498	PROTOPORPHYRINOGEN OXIDASE	11431	-0.230272	0.0603793	No
7351	UNCOUPLING PROTEIN 2 (MITOCHONDRIAL, PROTON CARRIER)	11465	-0.233037	0.0589245	No
51295	SIGNALING INTERMEDIATE IN TOLL PATHWAY, EVOLUTIONARILY CONSERVED	11467	-0.233077	0.0597901	No
9205	ZINC FINGER, MYM-TYPE 5	11500	-0.235422	0.0584078	No
79446	WD REPEAT DOMAIN 25	11509	-0.236223	0.0587658	No
84132	UBIQUITIN SPECIFIC PEPTIDASE 42	11521	-0.237078	0.0589063	No
1117	CHITINASE 3-LIKE 2	11527	-0.237513	0.0594818	No
51611	DPH5 HOMOLOG (S. CEREVISIAE)	11530	-0.237618	0.0602748	No
8568	DNA SEGMENT ON CHROMOSOME 21 (UNIQUE) 2056 EXPRESSED SEQUENCE	11569	-0.240578	0.0584575	No
114799	ESTABLISHMENT OF COHESION 1 HOMOLOG 1 (S. CEREVISIAE)	11580	-0.240984	0.0586705	No
26074	CHROMOSOME 20 OPEN READING FRAME 26	11591	-0.241461	0.0588835	No
160140	HYPOTHETICAL PROTEIN MGC33948	11620	-0.243946	0.0577912	No
4292	MUTL HOMOLOG 1, COLON CANCER, NONPOLYPOSIS TYPE 2 (E. COLI)	11640	-0.24567	0.0573516	No
8339	HISTONE 1, H2BD	11645	-0.2461	0.0579997	No
3074	HEXOSAMINIDASE B (BETA POLYPEPTIDE)	11653	-0.24649	0.0584302	No
1659	DEAH (ASP-GLU-ALA-HIS) BOX POLYPEPTIDE 8	11688	-0.249086	0.0569029	No
7554	ZINC FINGER PROTEIN 8 (CLONE HF.18)	11700	-0.249938	0.0570433	No
84549	RNA BINDING MOTIF PROTEIN 13	11712	-0.250899	0.0571838	No
255374	SIMILAR TO HYPOTHETICAL PROTEIN MGC49416	11725	-0.252271	0.0572518	No
6820	SULFOTRANSFERASE FAMILY, CYTOSOLIC, 2B, MEMBER 1	11748	-0.253974	0.0565946	No
89782	LEISHMANOLYSIN-LIKE (METALLOPEPTIDASE M8 FAMILY)	11786	-0.257497	0.0548498	No
339541	HYPOTHETICAL LOC339541	11807	-0.258595	0.0543376	No
27230	STRESS-ASSOCIATED ENDOPLASMIC RETICULUM PROTEIN 1	11829	-0.260732	0.053753	No
9361	PROTEASE, SERINE, 15	11841	-0.261564	0.0538935	No
3191	HETEROGENEOUS NUCLEAR RIBONUCLEOPROTEIN L	11860	-0.263164	0.0535264	No
126526	HYPOTHETICAL PROTEIN FLJ36888	11862	-0.263281	0.0543919	No
9724	UTP14, U3 SMALL NUCLEOLAR RIBONUCLEOPROTEIN, HOMOLOG C (YEAST)	11904	-0.266556	0.0523571	No
4643	MYOSIN IE	11912	-0.267053	0.0527876	No
27125	AF4/FMR2 FAMILY, MEMBER 4	11939	-0.269512	0.0518404	No
51602	HYPOTHETICAL PROTEIN HSPC120	12028	-0.276122	0.0463975	No
57594	KIAA1443	12060	-0.278721	0.0450877	No
6490	SILVER HOMOLOG (MOUSE)	12083	-0.280181	0.0444306	No
220047	HYPOTHETICAL PROTEIN MGC34732	12100	-0.2814	0.0442085	No
10213	PROTEASOME (PROSOME, MACROPAIN) 26S SUBUNIT, NON-ATPASE, 14	12109	-0.281807	0.0445665	No
26151	N-ACETYLTRANSFERASE 9	12148	-0.284859	0.0427491	No
1314	COATOMER PROTEIN COMPLEX, SUBUNIT ALPHA	12175	-0.28699	0.0418019	No
56848	SPHINGOSINE KINASE 2	12181	-0.28724	0.0423775	No
208	V-AKT MURINE THYMOMA VIRAL ONCOGENE HOMOLOG 2	12194	-0.288707	0.0424454	No
119032	ARSENIC (+3 OXIDATION STATE) METHYLTRANSFERASE	12229	-0.291264	0.0409181	No
113278	CHROMOSOME 20 OPEN READING FRAME 54	12232	-0.291839	0.0417112	No
79139	DER1-LIKE DOMAIN FAMILY, MEMBER 1	12258	-0.293879	0.0408365	No
4524	5,10-METHYLENETETRAHYDROFOLATE REDUCTASE (NADPH)	12292	-0.29714	0.0393817	No
55835	CENTROMERE PROTEIN J	12298	-0.297458	0.0399573	No
84669	UBIQUITIN SPECIFIC PEPTIDASE 32	12322	-0.299607	0.0392276	No
55069	HYPOTHETICAL PROTEIN FLJ10099	12364	-0.303591	0.0371927	No
81576	HYPOTHETICAL PROTEIN MGC10471	12370	-0.30424	0.0377683	No
55325	HYPOTHETICAL PROTEIN FLJ11200	12373	-0.304514	0.0385613	No
8943	ADAPTOR-RELATED PROTEIN COMPLEX 3, DELTA 1 SUBUNIT	12418	-0.308786	0.0363089	No
3887	KERATIN, HAIR, BASIC, 1	12434	-0.31012	0.0361593	No
54663	WD REPEAT DOMAIN 74	12443	-0.310941	0.0365173	No
9573	GROWTH DIFFERENTIATION FACTOR 3	12502	-0.315356	0.0332498	No
91445	RING FINGER PROTEIN 185	12510	-0.316069	0.0336803	No
7453	INTERFERON-INDUCED PROTEIN 53	12534	-0.318502	0.0329506	No
6729	SIGNAL RECOGNITION PARTICLE 54KDA	12538	-0.318825	0.0336712	No
10873	MALIC ENZYME 3, NADP(+)-DEPENDENT, MITOCHONDRIAL	12572	-0.322469	0.0322164	No
6429	SPLICING FACTOR, ARGININE/SERINE-RICH 4	12650	-0.329896	0.0275711	No
6570	SOLUTE CARRIER FAMILY 18 (VESICULAR MONOAMINE), MEMBER 1	12708	-0.337486	0.0243761	No
1420	CRYSTALLIN, GAMMA C	12762	-0.34292	0.0214711	No
6441	SURFACTANT, PULMONARY-ASSOCIATED PROTEIN D	12768	-0.343567	0.0220466	No
6286	S100 CALCIUM BINDING PROTEIN P	12777	-0.34452	0.0224046	No
124599	CD300 ANTIGEN LIKE FAMILY MEMBER B	12798	-0.346938	0.0218925	No
643	BURKITT LYMPHOMA RECEPTOR 1, GTP BINDING PROTEIN (CHEMOKINE (C-X-C MOTIF) RECEPTOR 5)	12819	-0.348331	0.0213803	No
80028	F-BOX AND LEUCINE-RICH REPEAT PROTEIN 18	12825	-0.349479	0.0219559	No
122970	ACYL-COA THIOESTERASE 4	12827	-0.349789	0.0228215	No
8398	PHOSPHOLIPASE A2, GROUP VI (CYTOSOLIC, CALCIUM-INDEPENDENT)	12881	-0.355026	0.0199165	No
55252	ADDITIONAL SEX COMBS LIKE 2 (DROSOPHILA)	12883	-0.355035	0.020782	No
196752	SIMILAR TO CG32542-PA	12907	-0.357074	0.0200524	No
92822	ZINC FINGER PROTEIN 276	12908	-0.357097	0.0209904	No
8611	PHOSPHATIDIC ACID PHOSPHATASE TYPE 2A	12928	-0.359621	0.0205508	No
6303	SPERMIDINE/SPERMINE N1-ACETYLTRANSFERASE	12940	-0.360732	0.0206913	No
4594	METHYLMALONYL COENZYME A MUTASE	12958	-0.363235	0.0203967	No
94104	GC-RICH SEQUENCE DNA-BINDING FACTOR CANDIDATE	12967	-0.364097	0.0207547	No
126402	HYPOTHETICAL PROTEIN FLJ40365	13017	-0.368916	0.0181397	No
91749	KIAA1919	13023	-0.369883	0.0187153	No
10482	NUCLEAR RNA EXPORT FACTOR 1	13025	-0.369994	0.0195808	No
10762	NUCLEOPORIN 50KDA	13030	-0.3705	0.0202289	No
56061	UBIQUITIN-BINDING PROTEIN HOMOLOG	13050	-0.373154	0.0197893	No
79906	MORN REPEAT CONTAINING 1	13059	-0.374442	0.0201473	No
28987	PSMD8 BINDING PROTEIN 1	13064	-0.375137	0.0207953	No
7405	UV RADIATION RESISTANCE ASSOCIATED GENE	13072	-0.376039	0.0212258	No
125972	CALRETICULIN 3	13076	-0.37661	0.0219464	No
85365	ASPARAGINE-LINKED GLYCOSYLATION 2 HOMOLOG (YEAST, ALPHA-1,3-MANNOSYLTRANSFERASE)	13083	-0.376871	0.0224494	No
256471	HYPOTHETICAL PROTEIN MGC33302	13086	-0.377157	0.0232424	No
54555	DEAD (ASP-GLU-ALA-ASP) BOX POLYPEPTIDE 49	13087	-0.377244	0.0241805	No
8394	PHOSPHATIDYLINOSITOL-4-PHOSPHATE 5-KINASE, TYPE I, ALPHA	13126	-0.38212	0.0223632	No
25963	TRANSMEMBRANE PROTEIN 87A	13199	-0.394044	0.0180805	No
8351	HISTONE 1, H3A	13204	-0.394996	0.0187285	No
79925	KPL2 PROTEIN	13208	-0.395465	0.0194491	No
53349	ZINC FINGER, FYVE DOMAIN CONTAINING 1	13210	-0.39608	0.0203147	No
125228	CHROMOSOME 18 OPEN READING FRAME 19	13211	-0.396107	0.0212527	No
4287	ATAXIN 3	13214	-0.396209	0.0220458	No
6728	SIGNAL RECOGNITION PARTICLE 19KDA	13255	-0.401964	0.0200834	No
9992	POTASSIUM VOLTAGE-GATED CHANNEL, ISK-RELATED FAMILY, MEMBER 2	13267	-0.403565	0.0202239	No
26261	F-BOX PROTEIN 24	13285	-0.405189	0.0199293	No
146691	TARGET OF MYB1-LIKE 2 (CHICKEN)	13312	-0.408872	0.0189821	No
85865	HYPOTHETICAL PROTEIN	13345	-0.413676	0.0175998	No
55854	LIKELY ORTHOLOG OF MOUSE IMMEDIATE EARLY RESPONSE, ERYTHROPOIETIN 4	13346	-0.413947	0.0185379	No
8894	EUKARYOTIC TRANSLATION INITIATION FACTOR 2, SUBUNIT 2 BETA, 38KDA	13383	-0.41831	0.0168656	No
6198	RIBOSOMAL PROTEIN S6 KINASE, 70KDA, POLYPEPTIDE 1	13384	-0.418413	0.0178037	No
55422	ZINC FINGER PROTEIN 331	13385	-0.418454	0.0187418	No
27131	SORTING NEXIN 5	13390	-0.41914	0.0193898	No
6755	SOMATOSTATIN RECEPTOR 5	13427	-0.425121	0.0177175	No
8896	G10 PROTEIN	13430	-0.425572	0.0185106	No
55249	YY1 ASSOCIATED PROTEIN 1	13452	-0.429893	0.0179259	No
2959	GENERAL TRANSCRIPTION FACTOR IIB	13480	-0.435393	0.0169062	No
7593	ZINC FINGER PROTEIN 42 (MYELOID-SPECIFIC RETINOIC ACID-RESPONSIVE)	13528	-0.445112	0.0144363	No
9567	GTP BINDING PROTEIN 1	13539	-0.447182	0.0146493	No
84894	LEUCINE RICH REPEAT NEURONAL 6A	13547	-0.448645	0.0150798	No
5837	PHOSPHORYLASE, GLYCOGEN; MUSCLE (MCARDLE SYNDROME, GLYCOGEN STORAGE DISEASE TYPE V)	13556	-0.449902	0.0154378	No
8364	H4 HISTONE, FAMILY 2	13568	-0.451438	0.0155782	No
84680	1-AMINOCYCLOPROPANE-1-CARBOXYLATE SYNTHASE	13569	-0.451572	0.0165163	No
6146	RIBOSOMAL PROTEIN L22	13598	-0.456966	0.0154241	No
64400	FUSED TOES HOMOLOG (MOUSE)	13613	-0.45923	0.015347	No
94059	LEUKOCYTE RECEPTOR CLUSTER (LRC) MEMBER 9	13614	-0.459338	0.0162851	No
81693	AMNIONLESS HOMOLOG (MOUSE)	13615	-0.459668	0.0172232	No
92106	OXIDOREDUCTASE NAD-BINDING DOMAIN CONTAINING 1	13644	-0.465039	0.016131	No
10861	SOLUTE CARRIER FAMILY 26 (SULFATE TRANSPORTER), MEMBER 1	13672	-0.471332	0.0151113	No
3797	KINESIN FAMILY MEMBER 3C	13678	-0.472004	0.0156868	No
346689	FLJ44186 PROTEIN	13684	-0.472824	0.0162623	No
24140	FTSJ HOMOLOG 1 (E. COLI)	13689	-0.473504	0.0169104	No
54813	BTB (POZ) DOMAIN CONTAINING 5	13780	-0.494319	0.0113225	No
134266	GRPE-LIKE 2, MITOCHONDRIAL (E. COLI)	13807	-0.498635	0.0103753	No
10525	HYPOXIA UP-REGULATED 1	13811	-0.499176	0.0110958	No
23185	LA RIBONUCLEOPROTEIN DOMAIN FAMILY, MEMBER 5	13812	-0.499467	0.0120339	No
246243	RIBONUCLEASE H1	13816	-0.500266	0.0127545	No
25	V-ABL ABELSON MURINE LEUKEMIA VIRAL ONCOGENE HOMOLOG 1	13828	-0.50215	0.0128949	No
25976	TCDD-INDUCIBLE POLY(ADP-RIBOSE) POLYMERASE	13855	-0.508456	0.0119477	No
23594	ORIGIN RECOGNITION COMPLEX, SUBUNIT 6 HOMOLOG-LIKE (YEAST)	13903	-0.523405	0.00947779	No
152926	PROTEIN PHOSPHATASE 1K (PP2C DOMAIN CONTAINING)	13914	-0.525798	0.00969076	No
2531	FOLLICULAR LYMPHOMA VARIANT TRANSLOCATION 1	13917	-0.5261	0.0104838	No
25831	HECT DOMAIN CONTAINING 1	13938	-0.530016	0.00997169	No
7048	TRANSFORMING GROWTH FACTOR, BETA RECEPTOR II (70/80KDA)	13948	-0.533325	0.0102572	No
23190	UBX DOMAIN CONTAINING 2	13958	-0.535888	0.0105427	No
51278	IMMEDIATE EARLY RESPONSE 5	13975	-0.538916	0.0103206	No
125144	CHROMOSOME 17 OPEN READING FRAME 45	14021	-0.550335	0.00799566	No
83732	RIO KINASE 1 (YEAST)	14022	-0.550359	0.00893375	No
55737	VACUOLAR PROTEIN SORTING 35 (YEAST)	14025	-0.551176	0.00972681	No
7486	WERNER SYNDROME	14051	-0.559086	0.00885212	No
286451	YIP1 DOMAIN FAMILY, MEMBER 6	14089	-0.57188	0.0071073	No
5033	PROCOLLAGEN-PROLINE, 2-OXOGLUTARATE 4-DIOXYGENASE (PROLINE 4-HYDROXYLASE), ALPHA POLYPEPTIDE I	14091	-0.572578	0.00797288	No
8774	N-ETHYLMALEIMIDE-SENSITIVE FACTOR ATTACHMENT PROTEIN, GAMMA	14131	-0.580675	0.00608303	No
6524	SOLUTE CARRIER FAMILY 5 (SODIUM/GLUCOSE COTRANSPORTER), MEMBER 2	14135	-0.582632	0.00680358	No
80219	COENZYME Q10 HOMOLOG B (YEAST)	14146	-0.585487	0.00701656	No
54386	TELOMERIC REPEAT BINDING FACTOR 2, INTERACTING PROTEIN	14176	-0.595331	0.00585183	No
79137	CHROMOSOME 2 OPEN READING FRAME 17	14206	-0.608685	0.00468709	No
54585	LEUCINE ZIPPER TRANSCRIPTION FACTOR-LIKE 1	14209	-0.61052	0.00548016	No
4329	ALDEHYDE DEHYDROGENASE 6 FAMILY, MEMBER A1	14249	-0.625233	0.00359031	No
2703	GAP JUNCTION PROTEIN, ALPHA 8, 50KDA (CONNEXIN 50)	14256	-0.627047	0.00409333	No
25988	MBD2-INTERACTING ZINC FINGER	14266	-0.631569	0.00437882	No
11235	PROGRAMMED CELL DEATH 10	14330	-0.662767	0.000748707	No
9584	RNA-BINDING REGION (RNP1, RRM) CONTAINING 2	14332	-0.663596	0.00161428	No
64215	DNAJ (HSP40) HOMOLOG, SUBFAMILY C, MEMBER 1	14376	-0.680626	-0.000565607	No
51068	NMD3 HOMOLOG (S. CEREVISIAE)	14389	-0.688495	-0.000497653	No
22928	SELENOPHOSPHATE SYNTHETASE 2	14396	-0.691686	5.36663e-06	No
23545	ATPASE, H+ TRANSPORTING, LYSOSOMAL V0 SUBUNIT A2	14424	-0.703996	-0.00101435	No
4779	NUCLEAR FACTOR (ERYTHROID-DERIVED 2)-LIKE 1	14430	-0.707736	-0.000438815	No
2801	GOLGI AUTOANTIGEN, GOLGIN SUBFAMILY A, 2	14442	-0.714288	-0.00029835	No
51130	ANKYRIN REPEAT AND SOCS BOX-CONTAINING 3	14455	-0.73015	-0.000230396	No
79663	HSPB (HEAT SHOCK 27KDA) ASSOCIATED PROTEIN 1	14469	-0.74673	-0.000234954	No
901	CYCLIN G2	14477	-0.750957	0.000195555	No
9110	MYOTUBULARIN RELATED PROTEIN 4	14484	-0.755526	0.000698575	No
84798	MULTIDRUG RESISTANCE-RELATED PROTEIN	14493	-0.762393	0.00105657	No
27013	CHROMOSOME 2 OPEN READING FRAME 24	14510	-0.782114	0.000834482	No
55718	POLYMERASE (RNA) III (DNA DIRECTED) POLYPEPTIDE E (80KD)	14522	-0.800699	0.000974947	No
440026	TRANSMEMBRANE PROTEIN 41B	14535	-0.81561	0.0010429	No
6653	SORTILIN-RELATED RECEPTOR, L(DLR CLASS) A REPEATS-CONTAINING	14560	-0.855734	0.000240721	No
4864	NIEMANN-PICK DISEASE, TYPE C1	14579	-0.891804	-0.000126391	No
55596	ZINC FINGER, CCHC DOMAIN CONTAINING 8	14621	-0.950826	-0.00216126	No
4651	MYOSIN X	14640	-0.98257	-0.00252837	No
51009	DER1-LIKE DOMAIN FAMILY, MEMBER 2	14651	-1.0084	-0.0023154	No
5597	MITOGEN-ACTIVATED PROTEIN KINASE 6	14660	-1.03415	-0.0019574	No
51187	CHROMOSOME 15 OPEN READING FRAME 15	14662	-1.0352	-0.00109182	No
64795	HYPOTHETICAL PROTEIN FLJ13910	14675	-1.06293	-0.00102387	No
83939	EUKARYOTIC TRANSLATION INITIATION FACTOR 2A, 65KDA	14710	-1.16294	-0.00255116	No
27248	CHROMOSOME 2 OPEN READING FRAME 30	14717	-1.17776	-0.00204814	No
10560	SOLUTE CARRIER FAMILY 19 (THIAMINE TRANSPORTER), MEMBER 2	14724	-1.2051	-0.00154512	No
5611	DNAJ (HSP40) HOMOLOG, SUBFAMILY C, MEMBER 3	14727	-1.20733	-0.000752054	No
9702	CENTROSOMAL PROTEIN 57KDA	14740	-1.25354	-0.000684101	No
9266	PLECKSTRIN HOMOLOGY, SEC7 AND COILED-COIL DOMAINS 2 (CYTOHESIN-2)	14741	-1.26068	0.000253986	No
79003	MIS12 HOMOLOG (YEAST)	14746	-1.29173	0.000902028	No
55761	TETRATRICOPEPTIDE REPEAT DOMAIN 17	14749	-1.29935	0.00169509	No
6897	THREONYL-TRNA SYNTHETASE	14764	-1.39207	0.00161802	No
9451	EUKARYOTIC TRANSLATION INITIATION FACTOR 2-ALPHA KINASE 3	14770	-1.43899	0.00219355	No
84706	GLUTAMIC PYRUVATE TRANSAMINASE (ALANINE AMINOTRANSFERASE) 2	14775	-1.48033	0.0028416	No
5277	PHOSPHATIDYLINOSITOL GLYCAN, CLASS A (PAROXYSMAL NOCTURNAL HEMOGLOBINURIA)	14792	-1.60741	0.00261951	No
55186	SOLUTE CARRIER FAMILY 25, MEMBER 36	14809	-1.73878	0.00239741	No
694	B-CELL TRANSLOCATION GENE 1, ANTI-PROLIFERATIVE	14840	-2.40657	0.00116017	No
